# Supplementary material for: Oxygen Reductases in Alphaproteobacterial Genomes: Physiological Evolution From Low to High Oxygen Environments
Source: Front Microbiol. 2019 Mar 18;10:499. doi: 10.3389/fmicb.2019.00499 (PMC6431628; doi:10.3389/fmicb.2019.00499)
Supplement: Supplementary file 1 [file Table_1.xlsx]

## Sheet: Table S1- distirbution
			% complet. *		aerobic/microaerophilic traits	A1	A2	B	C** eq cbb3		bd oxidase		NOR**			bc1	Genome	Assembly Level
class	order	total			10	HCO
alphabetical	alphabetical	proteins		organism		no	0				absent	absent				incomplete
											sub. I	sub. II
														#REF!	#REF!
alpha	Caulobacterales	2454	86.3	Caulobacterales bacterium RIFCSPHIGHO2_01_FULL_67_30	bo3, COX	2	0	0	0		yes	yes	0	#REF!	#REF!	yes , c1 separate	GCA_001796015.1_ASM179601v1	Scaffold
	Caulobacterales	2831	95.6835	Caulobacterales bacterium RIFCSPHIGHO2_01_FULL_70_19	cbb3, COX	1	0	0	1		yes	yes	1	#REF!	#REF!	no	GCA_001794825.1_ASM179482v1	Scaffold
	Holosporales/Rickettsiales	2990	96.4029	endosymbiont of Acanthamoeba sp. UWC8	AOX, cbb3	0	0	0	1		yes	yes	0	#REF!	#REF!	yes	GCA_000730245.1_ASM73024v1	Complete Genome
	Holosporales/Rickettsiales	2344	81.295	Holospora undulata HU1	AOX only	0	0	0	0		no	no	0	#REF!	#REF!	no	GCA_000388175.3_ASM38817v3	Scaffold
	Magnetococcales	3766	100	Magnetococcus marinus	cbb3	0	0	0	1		no	no	0	#REF!	#REF!	yes	GCA_000014865.1_ASM1486v1	Complete Genome
	Micavibrio	2432	100	Micavibrio aeruginosavorus ARL-13	1	1	0	0	0		yes	yes	0				GCA_000226315.1_ASM22631v1	Complete Genome
	Pelagibacterales	2811	91.3669	alpha proteobacterium HIMB5	COX	1	0	0	0		no	no	0	#REF!	#REF!	yes	GCA_000299095.1_ASM29909v1	Complete Genome
	Pelagibacterales	1370	87.7698	Pelagibacteraceae bacterium GOM-A1	COX	1	0	0	0		no	no	0	#REF!	#REF!	yes	GCA_001704065.1_ASM170406v1	Contig
	Rhizobiales	3198	87.7698	Afipia sp. 64-13	AOX, 2 cbb3, COX	1	0	0	2		yes	yes	1	#REF!	#REF!	no	GCA_001897755.1_ASM189775v1	Scaffold
	Rhizobiales	4622	97.8417	Afipia sp. NBIMC_P1-C1	cbb3, 3 COX	3	0	0	1		yes		0	#REF!	#REF!	no	GCF_000568595.1_NBIMC_P1-C1	Contig
	Rhizobiales	4621	97.8417	Afipia sp. NBIMC_P1-C2	cbb3, 2 COX	3	0	0	1		yes	no	0	#REF!	#REF!	no	GCF_000568615.1_NBIMC_P1-C2	Contig
	Rhizobiales	4752	97.8417	Afipia sp. OHSU_I-C4	cbb3, 2 COX	2	0	0	1		yes	no	0	#REF!	#REF!	no	GCF_000497635.1_OHSU_J-C4	Contig
	Rhizobiales	4752	97.8417	Afipia sp. OHSU_II-C1	cbb3, 3 COX	2	0	0	1		yes	no	0	#REF!	#REF!	no	GCF_000497575.1_OHSU_S-C1	Contig
	Rhizobiales	4749	97.8417	Afipia sp. OHSU_II-C2	cbb3, 2 COX	2	0	0	1		yes	no	0	#REF!	#REF!	no	GCF_000497595.1_OHSU_S-C2	Contig
	Rhizobiales	9403	95.6835	Afipia sp. P52-10	COX	3	0	0	0		no	no	0	#REF!	#REF!	yes, bc fused	GCA_000516555.1_P52-10	Contig
	Rhizobiales	8796	95.6835	Afipia sp. Root123D2	2 cbb3, COX	1	0	0	1		yes	yes	0	#REF!	#REF!	yes, bc fused	GCA_001425835.1_Root123D2	Contig
	Rhizobiales	4677	100 (96.4)	Aureimonas sp. AU40	bo3, 4 COX	4	1	0	0		yes	yes	0	#REF!	#REF!	ISP miissing	GCF_001463785.1_ASM146378v1	Contig
	Rhizobiales	7978	97.8417	Aureimonas sp. Leaf324	2 COX	3	0	0	0		yes	yes	0	#REF!	#REF!	yes	GCA_001423245.1_Leaf324	Contig
	Rhizobiales	8437	97.8417	Aureimonas sp. Leaf454	cbb3, bo3, 3 COX	4*	0	0	1		no	no	0	#REF!	#REF!	yes	GCA_001424685.1_Leaf454	Contig
	Rhizobiales	4190	96.4029	Aureimonas sp. N4	bo3, COX	4	0	0	0		yes	yes	0	#REF!	#REF!	yes	GCF_001463925.1_ASM146392v1	Contig
	Rhizobiales	5976	97.8417	Beijerinckia sp. 28-YEA-48	cbb3, 2 COX	2	0	0	1		yes	yes	0	#REF!	#REF!	yes	GCA_900104955.1_IMG-taxon_2693429820_annotated_assembly	Contig
	Rhizobiales	4144	96.4029	Bosea sp. 117	cbb3, COX	2	0	0	1		yes	yes	0	#REF!	#REF!	yes	GCF_000702305.1_ASM70230v1	Scaffold
	Rhizobiales	8044	97.1223	Bosea sp. AAP35	cbb3, COX	1	0	0	1		yes	yes	0	#REF!	#REF!	yes	GCA_001295925.1_ASM129592v1	Contig
	Rhizobiales	7750	96.4029	Bosea sp. Leaf344	cbb3, 2 COX	1	0	0	1		yes	yes	0	#REF!	#REF!	yes	GCA_001426225.1_Leaf344	Scaffold
	Rhizobiales	10155	97.1223	Bosea sp. PAMC 26642	2 COX	2	0	0	0		yes	yes	0	#REF!	#REF!	yes	GCA_001562255.1_ASM156225v1	Complete Genome
	Rhizobiales	5116	97.8417	Bosea sp. UNC402CLCol	bo3, COX	2	0	0	0		yes	yes	0	#REF!	#REF!	yes	GCF_000745475.1_ASM74547v1	Scaffold
	Rhizobiales	4236	97.1223	Bradyrhizobiaceae bacterium SG-6C	cbb3, COX	1	0	0	1		yes	yes	0	#REF!	#REF!	yes, bc fused	GCA_000219645.1_ASM21964v1	Chromosome
	Rhizobiales	7786	96.4029	Bradyrhizobium sp. Ai1a-2	AOX, bo3, cbb3, 4? COX	4	0	1	1		yes	yes	1	#REF!	#REF!	no	GCF_000426245.1_ASM42624v1	Scaffold
	Rhizobiales	7721	96.4029	Bradyrhizobium sp. LTSPM299	4 COX, ba3	4	0	1	0		yes	yes	0	#REF!	#REF!	yes, bc fused	GCA_000938235.1_ASM93823v1	Scaffold
	Rhizobiales	7728	97.1223	Bradyrhizobium sp. NAS96.2	2 cbb3, 4 COX	3	1	0	2		yes	yes	0	#REF!	#REF!	yes, bc fused	GCA_001908235.1_ASM190823v1	Contig
	Rhizobiales	1685	96.4029	Candidatus Tokpelaia hoelldoblerii	bo3, COX	2	0	0	0		no	no	0	#REF!	#REF!	no	GCA_002005325.1_ASM200532v1	Complete Genome
	Rhizobiales	4804	96.4029	Cohaesibacter marisflavi	cbb3, COX	1	0	0	1		yes	yes	1	#REF!	#REF!	yes , c1 separate	GCA_900115225.1_IMG-taxon_2617270874_annotated_assembly	Scaffold
	Rhizobiales	3772	97.8417	Devosia sp. 63-57	2 cbb3, 2 COX	2	0	0	2		yes	no	0	#REF!	#REF!	no	GCA_001899045.1_ASM189904v1	Scaffold
	Rhizobiales	5411	97.1223	Devosia sp. 66-14	COX	2	0	0	1		yes	no	0	#REF!	#REF!	yes	GCA_001899085.1_ASM189908v1	Scaffold
	Rhizobiales	4223	94.2446	Devosia sp. 66-22	cbb3, 2 COX	2	0	0	1		yes	yes	0	#REF!	#REF!	yes, b separate	GCA_001899065.1_ASM189906v1	Scaffold
	Rhizobiales	4052	97.8417	Devosia sp. 67-54	cbb3, 3 COX	2	1	0	1		yes	yes	0	#REF!	#REF!	yes	GCA_001899075.1_ASM189907v1	Scaffold
	Rhizobiales	4296	100 (97.8)	Devosia sp. H5989	COX	1	0	0	0		yes	yes	0	#REF!	#REF!	yes, ISP separate	GCA_001185205.1_ASM118520v1	Complete Genome
	Rhizobiales	3690	97.8417	Devosia sp. Root436	2 cbb3, 2 COX	1	0	0	1*		yes	yes	0	#REF!	#REF!	yes, split cluster	GCA_001426345.1_Root436	Scaffold
	Rhizobiales	7148	97.8417	Devosia sp. Root635	cbb3, 1 COX	1	0	0	1		yes	yes	0	#REF!	#REF!	yes, split cluster	GCA_001427605.1_Root635	Scaffold
	Rhizobiales	3687	97.8417	Devosia sp. YR412	bo3, 2 COX	3	0	0	0		yes	yes	0	#REF!	#REF!	yes	GCA_900110945.1_IMG-taxon_2690315612_annotated_assembly	Contig
	Rhizobiales	3670	78.4173	Hoeflea sp. BRH_c9	2 cbb3, 2 COX	1*/2	0	0	2		yes	yes	1*partial	#REF!	#REF!	yes , c1 separate	GCA_000961635.1_41k	Contig
	Rhizobiales	5400	97.1223	Hyphomicrobium sp. CS1BSMeth3	cbb3, COX	3	0	1	1		yes	yes	0	#REF!	#REF!	yes , c1 separate	GCF_900117415.1_CS1BSMeth3_assembly_1	Contig
	Rhizobiales	3726	97.1223	Hyphomicrobium sp. CS1GBMeth3	cbb3, 4 COX	4	0	0	1		yes	yes	0	#REF!	#REF!	yes	GCF_900117455.1_CS1GBMeth3	Contig
	Rhizobiales	3502	77.6978	Mesorhizobium sp. 61-13	cbb3, 2 COX	2	0	0	1		yes	yes	0	#REF!	#REF!	yes	GCA_001897075.1_ASM189707v1	Scaffold
	Rhizobiales	5582	97.8417	Mesorhizobium sp. AA23	2 bo3, cbb3, 3 COX	5	0	0	1		yes	yes	0	#REF!	#REF!	ISP missing	GCA_001672435.1_AA23	Contig
	Rhizobiales	6300	97.1223	Methylobacterium sp. 190mf	3 COX	2	1	0	0		yes	yes	0	#REF!	#REF!	yes, split cluster	Methylobacterium_sp._190mf	Contig
	Rhizobiales	4135	97.1223	Methylobacterium sp. Leaf100	3 COX	2	1	0	0		yes	yes	0	#REF!	#REF!	cyt c1 missing	GCA_001422845.1_Leaf100	Scaffold
	Rhizobiales	6494	95.6835	Methyloceanibacter caenitepidi	bo3, cbb3, COX	3	0	0	1		yes	yes	0	#REF!	#REF!	yes	GCA_000828475.1_ASM82847v1	Complete Genome
	Rhizobiales	5596	74.1007	Methyloceanibacter stevinii	bo3, cbb3, 2 COX	3	0	0	0		yes	yes	0	#REF!	#REF!	yes , c1 separate	GCA_001723355.1_ASM172335v1	Contig
	Rhizobiales	4199	95.6835	Methylocystis sp. LW5	cbb3, 1 COX	1	0	0	1		yes	yes	0	#REF!	#REF!	ISP only	GCF_000685825.1_ASM68582v1	Contig
	Rhizobiales	5972	95.6835	Methyloligella halotolerans	bo3, 2 COX	2	0	1	0		yes	yes	0	#REF!	#REF!	yes , c1 partial	GCA_001708935.1_Meth_hal_C2_1.0	Contig
	Rhizobiales	4529	97.8417	Methylosinus sp. PW1	cbb3, COX	1	0	0	1		yes	yes	0	#REF!	#REF!	yes	GCF_000745215.1_ASM74521v1	Contig
	Rhizobiales	4632	97.1223	Microvirga sp. BSC39	cbb3, 3 COX	3	0	0	1		yes	2 yes	1	#REF!	#REF!	yes	GCA_000739015.1_ASM73901v1	Contig
	Rhizobiales	3023	74.1007	Nitrobacter sp. 62-13	bo3, 2 COX	0	2	1	0		yes	yes	0	#REF!	#REF!	yes, bc fused	GCA_001896955.1_ASM189695v1	Scaffold
	Rhizobiales	3304	85.6115	Nitrobacter sp. 62-23	bo3, COX	0	1	1	0		yes	yes	0	#REF!	#REF!	yes, bc fused	GCA_001897285.1_ASM189728v1	Scaffold
	Rhizobiales	4706	96.4029	Ochrobactrum sp. P6BS-III	cbb3, 3 COX	3	0	0	1		yes	no	0	#REF!	#REF!	yes	GCA_002016635.1_ASM201663v1	Contig
	Rhizobiales	3802	84.8921	Pelagibacterium sp. SCN 63-126	2 cbb3, 2 COX	2	0	0	2		yes	yes	0	#REF!	#REF!	yes	GCA_001724555.1_ASM172455v1	Contig
	Rhizobiales	7592	94.964	Pelagibacterium sp. SCN 64-44	2 cbb3, 2 COX	3	0	0	4		yes	yes	0	#REF!	#REF!	yes , c1 separate	GCA_001724955.1_ASM172495v1	Scaffold
	Rhizobiales	4460	97.8417	Phyllobacterium sp. CL33Tsu	2 COX	2	0	0	0		yes	yes	0	#REF!	#REF!	yes, split cluster	GCA_900113985.1_IMG-taxon_2639762575_annotated_assembly	Contig
	Rhizobiales	3958	96.4029	Pleomorphomonas koreensis	cbb3, bo3	1	0	0	1		yes	yes	0	#REF!	#REF!	yes	GCF_000425185.1_ASM42518v1	Scaffold
	Rhizobiales	3285	94.964	Pseudochrobactrum sp. AO18b	bo3, cbb3, COX	2	0	0	1		2 yes	yes	0	#REF!	#REF!	no	GCF_000409565.1_AO18b	Contig
	Rhizobiales	5228	90.6475	Rhizobiales bacterium 62-17	COX	1	0	0	0		yes	yes	0	#REF!	#REF!	yes	GCA_001898965.1_ASM189896v1	Scaffold
	Rhizobiales	4486	97.1223	Rhizobiales bacterium 62-47	AOX, cbb3, 2 COX	1	1	0	1		yes	yes	0	#REF!	#REF!	yes	GCA_001899255.1_ASM189925v1	Scaffold
	Rhizobiales	3742	90.6475	Rhizobiales bacterium 63-22	2 COX	2	0	0	0		yes	yes	0	#REF!	#REF!	yes	GCA_001898995.1_ASM189899v1	Scaffold
	Rhizobiales	4877	97.1223	Rhizobiales bacterium 63-7	cbb3, bo3, COX	1	1	0	1		yes	no	0	#REF!	#REF!	yes	GCA_001897115.1_ASM189711v1	Scaffold
	Rhizobiales	4266	96.4029	Rhizobiales bacterium 64-17	cbb3, COX	1	0	0	1		yes	yes	0	#REF!	#REF!	yes	GCA_001899285.1_ASM189928v1	Scaffold
	Rhizobiales	4788	89.9281	Rhizobiales bacterium 65-79	AOX, 2 cbb3, 2 COX	1	1	0	2		no	yes	0	#REF!	#REF!	yes	GCA_001896885.1_ASM189688v1	Scaffold
	Rhizobiales	3924	91.3669	Rhizobiales bacterium 65-9	2 cbb3, COX	1	0	0	2		yes	yes	0	#REF!	#REF!	yes	GCA_001899525.1_ASM189952v1	Scaffold
	Rhizobiales	9156	97.8417	Rhizobiales bacterium GAS113	cbb3, 2 COX	3*	0	0	0		3 yes	3 yes	0	#REF!	#REF!	yes	GCA_900103895.1_IMG-taxon_2693430035_annotated_assembly	Contig
	Rhizobiales	8053	97.8417	Rhizobiales bacterium GAS188	cbb3, 2 COX	2	0	0	0		yes	yes	0	#REF!	#REF!	no	GCA_900104855.1_IMG-taxon_2693429787_annotated_assembly	Contig
	Rhizobiales	8956	97.8417	Rhizobiales bacterium GAS191	cbb3, COX	2	0	0	0		2 yes	yes	0	#REF!	#REF!	no	GCA_900105365.1_IMG-taxon_2690315650_annotated_assembly	Contig
	Rhizobiales	3849	97.8417	Rhizobiales bacterium HL-109	cbb3, COX	2	0	0	1		yes	2 yes	0	#REF!	#REF!	yes	GCA_900094735.1_IMG-taxon_2634166172_annotated_assembly	Contig
	Rhizobiales	4400	97.8417	Rhizobiales bacterium MIMtkB18	3	3	0	0	1		yes	yes	0	#REF!	#REF!	no	GCF_001927285.1_ASM192728v1	Contig
	Rhizobiales	4323	97.8417	Rhizobiales bacterium NRL2	cbb3, COX	1	0	0	1		yes	yes	1	#REF!	#REF!	yes	GCA_001664005.1_ASM166400v1	Complete Genome
	Rhizobiales	7042	100 (97.8)	Rhodoplanes sp. Z2-YC6860	cbb3, COX	2	0	0	1		yes	yes	0	#REF!	#REF!	yes, split cluster	GCA_001579845.1_ASM157984v1	Complete Genome
	Rhizobiales	4825	97.8417	Rhodopseudomonas pseudopalustris	COX, cbb3	2	0	0	1		yes	no	0	#REF!	#REF!	yes, bc fused	GCA_900110435.1_IMG-taxon_2671180228_annotated_assembly	Scaffold
	Rhizobiales	5375	97.8417	Rhodopseudomonas sp. AAP120	2bo3, cbb3, 2COX	4	0	0	1		yes	yes	1	#REF!	#REF!	yes, bc fused	GCA_001295845.1_ASM129584v1	Contig
	Rhizobiales	3080	98.5612	Roseospirillum parvum	cbb3, COX	0	0	0	1		yes	yes	0	#REF!	#REF!	yes	GCA_900100455.1_IMG-taxon_2675903017_annotated_assembly	Scaffold
	Rhizobiales	7427	96.4029	Sinorhizobium sp. GL2	bo3, cbb3, 3 COX	4	0	0	1		yes	yes	1	#REF!	#REF!	yes , c1 separate	GCA_001461715.1_ASM146171v1	Contig
	Rhizobiales	6970	98.5612	Terasakiella sp. PR1	cbb3, COX	1*	1	0	1		no	no	0	#REF!	#REF!	yes , c1 separate	GCA_900093605.1_Terasakiella_magnetica_strain_PR1	Contig
	Rhizobiales	4437	97.1223	Variibacter gotjawalensis	bo3, COX	2	0	0	0		yes	yes	0	#REF!	#REF!	yes	Variibacter_gotjawalensis	Complete Genome
	Rhizobiales/Rhodobacterales	7239	97.1223	Rhodovulum sp. ES.010	AOX, cbb3	0	0	0	1		yes	yes	0	#REF!	#REF!	yes, bc fused	GCA_900142935.1_IMG-taxon_2703719235_annotated_assembly	Contig
	Rhodobacterales	3642	97.8417	Rhodobacter capsulatus SB 1003	cbb3, COX	0	0	0	1		yes	yes	0	#REF!	#REF!	yes	GCA_000021865.1_ASM2186v1	Complete Genome
	Rhodobacterales	1689	75.5396	Rhodobacteraceae bacterium CG2_30_10_405	cbb3	0	0	0	1		no	no	0	#REF!	#REF!	no	GCA_001873855.1_ASM187385v1	Scaffold
	Rhodobacterales	3513	93.5252	Rhodobacteraceae bacterium CY02	cbb3, COX	2	0	0	1		no	no	0	#REF!	#REF!	yes	GCF_001719615.1_ASM171961v1	Contig
	Rhodobacterales	3813	96.4029	Rhodobacteraceae bacterium EhC02	cbb3, COX	1	0	0	1		yes	yes	0	#REF!	#REF!	no	GCA_001650895.1_ASM165089v1	Scaffold
	Rhodobacterales	3501	76.9784	Rhodobacteraceae bacterium GWF1_65_7		0	0	0	1		yes	yes	1	#REF!	#REF!	no	GCA_001828845.1_ASM182884v1	Scaffold
	Rhodobacterales	6235	96.4029	Rhodobacteraceae bacterium HIMB11	COX	1	0	0	0		no	no	0	#REF!	#REF!	no	GCA_000472185.1_HIMB11v1.0	Contig
	Rhodobacterales	3197	97.8417	Rhodobacteraceae bacterium HL-91 or Roseibaca calidilacus	2 cbb3, 2 COX	1(2)	0	0	1(2)		yes	no	0	#REF!	#REF!	no	GCA_001517585.1_IMG-taxon_2603880215_annotated_assembly	Contig
	Rhodobacterales	3684	97.1223	Rhodobacteraceae bacterium HLUCCA08	cbb3, COX	1	0	0	1		yes	yes	0	#REF!	#REF!	no	GCA_001314655.1_ASM131465v1	Scaffold
	Rhodobacterales	3603	97.1223	Rhodobacteraceae bacterium HLUCCA12	cbb3, COX	2	0	0	1		yes	yes	0	#REF!	#REF!	no	GCA_001314715.1_ASM131471v1	Scaffold
	Rhodobacterales	3304	97.1223	Rhodobacteraceae bacterium HLUCCO07	cbb3, COX	1	0	0	1		yes	yes	1	#REF!	#REF!	no	GCA_001314705.1_ASM131470v1	Scaffold
	Rhodobacterales	3678	97.1223	Rhodobacteraceae bacterium HLUCCO18	cbb3, COX	1*	0	0	1		yes	yes	0	#REF!	#REF!	no	GCA_001314805.1_ASM131480v1	Scaffold
	Rhodobacterales	4179	96.4029	Rhodobacteraceae bacterium HTCC2083	cbb3, COX	1	0	1	1		no	no	0	#REF!	#REF!	no	GCA_000156115.1_ASM15611v1	Scaffold
	Rhodobacterales	3667	96.4029	Rhodobacteraceae bacterium HTCC2150	cbb3, COX	1	0	0	1		no	no	0	#REF!	#REF!	no	GCA_000169395.1_ASM16939v1	Contig
	Rhodobacterales	4632	97.1223	Rhodobacteraceae bacterium PD-2	3 cbb3, 2 COX	2	0	0	1		yes	yes	0	#REF!	#REF!	no	GCA_000504185.2_ASM50418v2	Scaffold
	Rhodobacterales	6923	97.8417	Rhodobacteraceae bacterium SB2	COX	1	0	0	0		no	no	0	#REF!	#REF!	no	GCA_001642945.1_ASM164294v1	Contig
	Rhodobacterales	4470	95.6835	Rhodobacterales bacterium 65-51	cbb3, COX	1	0	0	2		yes	yes	1	#REF!	#REF!	yes	GCA_001898985.1_ASM189898v1	Scaffold
	Rhodospirales	3878	98.56	Rhodospirillum rubrum F11	cbb3	0	0	0	1		yes	yes	0		#REF!		GCA_000225955.1_ASM22595v1	Complete Genome
	Rhodospirillales	1727	94.2446	Acetobacter sp. 46_36		0	0	0	0		no	no	0	#REF!	#REF!	no	GCA_001917135.1_ASM191713v1	Scaffold
	Rhodospirillales	1538	91.3669	Acetobacter sp. CAG:267		0	0	0	0		no	no	0	#REF!	#REF!	no	GCA_000434135.1_MGS267	Scaffold
	Rhodospirillales	1775	89.21/...#	Acetobacter sp. CAG:977		0	0	0	0		no	no	0	#REF!	#REF!	no	GCA_000434295.1_MGS977	Scaffold
	Rhodospirillales	5570	98.5612	Acetobacter sp. SLV-7	bo3 oxidase	1(2)	0	0	0		yes	yes	1	#REF!	#REF!	no	GCA_001628715.1_ASM162871v1	Complete Genome
	Rhodospirillales	5289	97.8417	Acetobacteraceae bacterium AT-5844	bo3, COX	5	0	0	0		yes	yes	0	#REF!	#REF!	yes	GCA_000245075.1_ASM24507v1	Scaffold
	Rhodospirillales	1479	90.6475	Acidiphilium sp. CAG:727		0	0	0	0		no	no	0	#REF!	#REF!	no	GCA_000437515.1_MGS727	Scaffold
	Rhodospirillales	1603	95.0/97.3#	Alphaproteobacteria bacterium GWF2_58_20	AOX only	0	0	0	0		no	no	0	#REF!	#REF!	no	GCA_001768735.1_ASM176873v1	Scaffold
	Rhodospirillales	5669	100	Azospirillum brasilense sp7	4	2	1	0	1		yes	yes					GCA_001315015.1_ASM131501v1	Complete Genome
	Rhodospirillales	1781	95.6835	Azospirillum sp. 47_25		0	0	0	0		no	no	0	#REF!	#REF!	no	GCA_001917125.1_ASM191712v1	Scaffold
	Rhodospirillales	1902	94.964	Azospirillum sp. 51_20		0	0	0	0		no	no	0	#REF!	#REF!	no	GCA_001917175.1_ASM191717v1	Scaffold
	Rhodospirillales	1791	95.6835	Azospirillum sp. CAG:239		0	0	0	0		no	no	0	#REF!	#REF!	no	GCA_000436375.1_MGS239	Scaffold
	Rhodospirillales	1762	94.964	Azospirillum sp. CAG:260		0	0	0	0		no	no	0	#REF!	#REF!	no	GCA_000436195.1_MGS260	Scaffold
	Rhodospirillales	4574	100	Caenispirillum salinarum AK4	4	1	2	0	1		yes	yes					GCA_000315795.1_Caenispirillum_salinarum	Contig
	Rhodospirillales	5186	94.2446	Candidatus Endolissoclinum sp. TMED37	2019-02-01	1	0	0	1/0		no	no					GCA_002167635.1_ASM216763v1	Contig
	Rhodospirillales	5596	100	Dongia sp. URHE0060	2	1	1	0	0		yes	yes					GCF_000620685.1_ASM62068v1	Scaffold
	Rhodospirillales	6775	100	Inquilinus limosus DSM 16000	3	1	1	0	1		yes	yes					GCA_000423185.1_ASM42318v1	Scaffold
	Rhodospirillales	4351	100	Thalassospira xiamenensis M-5	3	1	1	0	1		yes	yes					GCA_900156715.1_IMG-taxon_2681813519_annotated_assembly	Contig
	Rhodospirillales	5515	96.4029	Reyranella massiliensis	3	2	0	0	1		yes	yes					GCF_000312425.1_ASM31242v1	Scaffold
	Rhodospirillales	3775	100	Magnetospira sp. QH2	3	1	0	0	1		no	no					GCA_000968135.1_ASM96813v1	Complete Genome
	Rhodospirillales	7540	97.8417	Magnetospirillum moscoviense	3	1(2)	0	0	1		no	no	1	#REF!	#REF!	yes	GCA_001650635.1_ASM165063v1	Contig
	Rhodospirillales	3356	97.84	Magnetovibrio blakemorei	3	0	1	1	1		no	no					GCA_001746755.1_ASM174675v1	Contig
	Rhodospirillales	3462	98.56/97.3#	Phaeospirillum fulvum MGU-K5	1	0	0	0	1		yes	yes	0	#REF!	#REF!	yes	GCA_000442515.1_PhaespirillumFulvum_1.0	Contig
	Rhodospirillales	4632	97.1223	Rhodobacterales bacterium RIFCSPHIGHO2_02_FULL_62_130	3	1	0	1	1		no	no	0	#REF!	#REF!	yes	GCA_001828855.1_ASM182885v1	Scaffold
	Rhodospirillales	4627	97.1223	Rhodobacterales bacterium RIFCSPHIGHO2_12_FULL_62_75	3	1	0	1	1		no	no	0	#REF!	#REF!	no	GCA_001828895.1_ASM182889v1	Scaffold
	Rhodospirillales	3703	97.8417	Rhodospira trueperi	2 cbb3	0	0	0	1		yes	yes	0	#REF!	#REF!	yes	GCA_900101965.1_IMG-taxon_2675903020_annotated_assembly	Scaffold
	Rhodospirillales	3424	82.0144	Rhodospirillaceae bacterium BRH_c57	cbb3, 2 partial & COX	1	0	1*	1 **		no	no	1	#REF!	#REF!	no, ISP only	GCA_000961745.1_41k	Contig
	Rhodospirillales	5253	94.2446	Rhodospirillales bacterium 69-11	cbb3, 2 COX	1	1	0	1		yes	yes	1	#REF!	#REF!	no	GCA_001898425.1_ASM189842v1	Scaffold
	Rhodospirillales	4448	97.1223	Rhodospirillales bacterium 70-18	2 cbb3, COX	1	0	0	2		yes	yes	0	#REF!	#REF!	yes	GCA_001899585.1_ASM189958v1	Scaffold
	Rhodospirillales	2558	89.9281	Rhodospirillales bacterium RIFCSPLOWO2_02_FULL_58_16	2 cbb3, COX/ba3?	1*	0	2	1		no	no	0	#REF!	#REF!	yes	GCA_001830425.1_ASM183042v1	Scaffold
	Rhodospirillales	2588	92.0863	Rhodospirillales bacterium RIFCSPLOWO2_12_FULL_58_28	cbb3, COX	1	0	2	1		no	no	0	#REF!	#REF!	no	GCA_001830455.1_ASM183045v1	Scaffold
	Rhodospirillales	1751	72.6619	Rhodospirillales bacterium RIFCSPLOWO2_12_FULL_67_15	cbb3, 2 COX & COX	1*	0	1	1		no	no	0	#REF!	#REF!	yes	GCA_001830475.1_ASM183047v1	Scaffold
	Rhodospirillales	7973	97.1223	Rhodospirillales bacterium URHD0017	cbb3, bo3, 3 COX	3	0	0	1		yes	yes	0	#REF!	#REF!	yes	GCA_900110395.1_IMG-taxon_2590828823_annotated_assembly	Scaffold
	Rhodospirillales	6061	97.1223	Rhodospirillales bacterium URHD0088	bo3, COX	2	0	0	0		yes	yes	0	#REF!	#REF!	yes	GCF_000518365.1_ASM51836v1	Scaffold
	Rhodospirillales	3779	98.5612	Zymomonas mobilis subsp. mobilis NCIMB 11163	bo3 oxidase	0	0	0	0		yes	yes	0	#REF!	#REF!	yes	GCA_000024245.1_ASM2424v1	Complete Genome
	Rickettsiales	1070	85.6115	Candidatus Hepatobacter penaei		0	0	0	0		yes	yes	0	#REF!	#REF!	no	GCF_000742475.1_ASM74247v1	Scaffold
	Rickettsiales	1924	94.964	Candidatus Neoehrlichia lotoris	COX	1(2)	0	0	0		no	no	0	#REF!	#REF!	yes , c1 separate	GCA_000964795.1_ASM96479v1	Contig
	Rickettsiales	3419	97.8417	Rickettsiales bacterium Ac37b	COX	1	0	0	0		yes	yes	0	#REF!	#REF!	yes, b separate	GCA_000746585.2_ASM74658v2	Complete Genome
	Sneathelliales	3178	83.4532	Sneathiella glossodoripedis	AOX, cbb3, COX	1	0	0	1		no	no	0	#REF!	#REF!	cyt c1 only	GCF_000616095.1_ASM61609v1	Contig
	Sphingomonadales	3084	97.8417	Erythrobacteraceae bacterium CCH12-C2	AOX, cbb3, COX	1	0	0	1		yes	yes	0	#REF!	#REF!	yes	GCF_001556995.1_ASM155699v1	Contig
	Sphingomonadales	2870	98.5612	Erythrobacteraceae bacterium HL-111	AOX, 2 cbb3, 2 COX	2	0	0	1		yes	yes	0	#REF!	#REF!	yes	GCA_001314765.1_ASM131476v1	Scaffold
	Sphingomonadales	3106	94.2446	Sphingomonadales bacterium 63-6	AOX, cbb3, bo3, COX	2	0	0	1		partial	yes	0	#REF!	#REF!	yes	GCA_001898545.1_ASM189854v1	Scaffold
	Sphingomonadales	2031	82.7338	Sphingomonadales bacterium BRH_c42	cbb3, COX	2	0	0	1		no	no	0	#REF!	#REF!	yes	GCA_001516125.1_41k	Contig
	Sphingomonadales	3909	97.1223	Sphingomonadales bacterium RIFCSPHIGHO2_01_FULL_65_20	cbb3, COX	2	0	0	1		yes	yes	0	#REF!	#REF!	yes	GCA_001829075.1_ASM182907v1	Scaffold
	Sphingomonadales	3487	97.1223	Sphingomonadales bacterium RIFCSPLOWO2_12_FULL_63_15	cbb3, COX	2	0	0	1		yes	yes	0	#REF!	#REF!	yes	GCA_001829085.1_ASM182908v1	Scaffold
	Sphingomonadales	9901	97.8417	Sphingomonas sp. Root50	2 cbb3, 2 COX	1	0	1	2		yes	yes	0	#REF!	#REF!	no	GCA_001426825.1_Root50	Scaffold
	Sphingomonadales	4209	80.5755	Sphingomonas-like bacterium B12	bo3, COX	2	1	0	0		yes	yes	0	#REF!	#REF!	yes	GCF_000333335.1_ASM33333v1	Contig
	unclassified alpha	4576	97.8417	alpha proteobacterium AAP38	2 cbb3, COX	1	0	0	2		yes	yes	0	#REF!	#REF!	yes , c1 separate	GCA_001296005.1_ASM129600v1	Contig
	unclassified alpha	6183	95.6835	alpha proteobacterium AAP81b	cbb3, COX	1	0	0	1		yes	yes	0	#REF!	#REF!	yes	GCA_001295935.1_ASM129593v1	Contig
	unclassified alpha	6128	97.8417	alpha proteobacterium BAL199	AOX, COX	1	0	0	0		yes	yes	0	#REF!	#REF!	yes	GCA_000171835.1_ASM17183v1	Contig
	unclassified alpha	2609	97.8417	alpha proteobacterium L41A	bo3, COX	3	0	0	0		yes	yes	0	#REF!	#REF!	yes	GCF_000335735.1_L41A.1.0	Contig
	unclassified alpha	3647	96.4029	alpha proteobacterium Mf 1.05b.01	cbb3, COX	1	0	0	1		no	no	1	#REF!	#REF!	yes	GCF_000509225.1_ASM50922v1	Contig
	unclassified alpha	5465	96.4029	alpha proteobacterium Q-1	cbb3, COX	1	0	0	1		yes	yes	0	#REF!	#REF!	yes	GCA_000710935.1_ASM71093v1	Contig
	unclassified alpha	3752	97.8417	alpha proteobacterium RS24	COX	1	0	0	0		no	no	0	#REF!	#REF!	yes	GCA_000469155.1_RS24	Contig
	unclassified alpha	4196	97.8417	alpha proteobacterium U9-1i	AOX, cbb3, COX	1	0	0	1		no	no	0	#REF!	#REF!	yes	GCA_000974665.1_ASM97466v1	Contig
	unclassified alpha	5670	89.9281	Alphaproteobacteria bacterium 13_2_20CM_2_64_7	COX, ba3	1	0	1	0		no	no	0	#REF!	#REF!	ISP only	GCA_001915105.1_ASM191510v1	Scaffold
alpha	unclassified alpha	1643	93.5252	Alphaproteobacteria bacterium 33-17	COX	1	0	1*	0		yes	yes	0	#REF!	#REF!	yes	GCA_001897445.1_ASM189744v1	Scaffold
	unclassified alpha	947	82.0144	Alphaproteobacteria bacterium 40-19	AOX, COX	0	0	0	0		no	no	0	#REF!	#REF!	no	GCA_001898075.1_ASM189807v1	Scaffold
	unclassified alpha	2526	91.3669	Alphaproteobacteria bacterium 41-28	AOX, COX	1	0	0	0		yes	yes	0	#REF!	#REF!	yes, bc fused	GCA_001897795.1_ASM189779v1	Scaffold
	unclassified alpha	1422	94.2446	Alphaproteobacteria bacterium 43-37	COX	1	0	0	0		yes	yes	1	#REF!	#REF!	yes	GCA_001897475.1_ASM189747v1	Scaffold
	unclassified alpha	2127	78.4173	Alphaproteobacteria bacterium 62-8	COX	1	0	0	0		no	no	0	#REF!	#REF!	missing cyt b	GCA_001898015.1_ASM189801v1	Scaffold
	unclassified alpha	6461	75.5396	Alphaproteobacteria bacterium 65-37	AOX, bo3, COX	2	0	0	1		yes	yes	2	#REF!	#REF!	yes	GCA_001897995.1_ASM189799v1	Scaffold
	unclassified alpha	4802	97.1223	Alphaproteobacteria bacterium AO1-B	bo3, cbb3, COX	2	0	0	1		yes	yes	0	#REF!	#REF!	yes	GCA_001890945.1_ASM189094v1	Contig
	unclassified alpha	3280	83.4532	Alphaproteobacteria bacterium BRH_c36	bo3, cbb3, COX	2	0	0	1		yes	yes	1	#REF!	#REF!	yes	GCA_001516065.1_ASM151606v1	Contig
	unclassified alpha	1983	96.4029	Alphaproteobacteria bacterium CG1_02_46_17	cbb3, COX	1	0	0	1		yes	yes	0	#REF!	#REF!	yes	GCA_001871905.1_ASM187190v1	Scaffold
	unclassified alpha	894	89.9281	Alphaproteobacteria bacterium GWA1_45_9		0	0	0	0		no	no	0	#REF!	#REF!	no	GCA_001767775.1_ASM176777v1	Scaffold
	unclassified alpha	1472	76.9784	Alphaproteobacteria bacterium GWA2_41_27	COX	1	0	0	0		no	no	0	#REF!	#REF!	no	GCA_001768725.1_ASM176872v1	Scaffold
	unclassified alpha	1445	92.0863	Alphaproteobacteria bacterium GWC2_42_16	COX	1	0	0	0		no	no	0	#REF!	#REF!	yes, bc fused	GCA_001767835.1_ASM176783v1	Scaffold
	unclassified alpha	1503	89.9281	Alphaproteobacteria bacterium RBG_16_42_14	COX	1	0	0	0		no	no	0	#REF!	#REF!	no	GCA_001768775.1_ASM176877v1	Scaffold
	unclassified alpha	1322	95.6835	Alphaproteobacteria bacterium RIFCSPHIGHO2_02_FULL_40_34	cbb3	0	0	0	1		no	no	0	#REF!	#REF!	yes , c1 separate	GCA_001767865.1_ASM176786v1	Scaffold
	unclassified alpha	1528	92.0863	Alphaproteobacteria bacterium RIFCSPHIGHO2_02_FULL_42_30	COX	1	0	0	0		no	no	0	#REF!	#REF!	no	GCA_001767885.1_ASM176788v1	Contig
	unclassified alpha	1964	93.5252	Alphaproteobacteria bacterium RIFCSPHIGHO2_02_FULL_46_13	cbb3	0	0	0	1		yes	yes	0	#REF!	#REF!	yes	GCA_001767915.1_ASM176791v1	Scaffold
	unclassified alpha	1549	92.0863	Alphaproteobacteria bacterium RIFCSPHIGHO2_12_42_13	COX	1	0	0	0		no	no	0	#REF!	#REF!	yes, bc fused	GCA_001768825.1_ASM176882v1	Scaffold
	unclassified alpha	1524	90.6475	Alphaproteobacteria bacterium RIFCSPHIGHO2_12_FULL_42_100	COX	1	0	0	0		no	no	0	#REF!	#REF!	no	GCA_001768845.1_ASM176884v1	Contig
	unclassified alpha	1447	72.6619	Alphaproteobacteria bacterium RIFCSPHIGHO2_12_FULL_45_9	cbb3, COX	1	0	0	1		no	no	0	#REF!	#REF!	ISP only	GCA_001768875.1_ASM176887v1	Scaffold
	unclassified alpha	3044	72.6619	Alphaproteobacteria bacterium RIFCSPHIGHO2_12_FULL_63_12	cbb3, COX	1	0	0	1		no	no	0	#REF!	#REF!	yes, split cluster	GCA_001767925.1_ASM176792v1	Scaffold
	unclassified alpha	3933	71.9424	Alphaproteobacteria bacterium RIFCSPHIGHO2_12_FULL_66_14	bo3, cbb3, COX	2	0	0	1		yes	yes	0	#REF!	#REF!	yes	GCA_001767945.1_ASM176794v1	Scaffold
	unclassified alpha	1333	95.6835	Alphaproteobacteria bacterium RIFCSPLOWO2_01_FULL_40_26	cbb3	0	0	0	1		no	no	0	#REF!	#REF!	no	GCA_001767955.1_ASM176795v1	Scaffold
	unclassified alpha	987	74.8201	Alphaproteobacteria bacterium RIFCSPLOWO2_02_42_7		0	0	0	0		no	no	0	#REF!	#REF!	no	GCA_001767995.1_ASM176799v1	Scaffold
	unclassified alpha	1353	95.6835	Alphaproteobacteria bacterium RIFCSPLOWO2_02_FULL_40_19	cbb3	0	0	0	1		no	no	0	#REF!	#REF!	no	GCA_001768015.1_ASM176801v1	Scaffold
	unclassified alpha	1504	89.9281	Alphaproteobacteria bacterium RIFCSPLOWO2_02_FULL_43_54	COX	1	0	0	0		no	no	0	#REF!	#REF!	no	GCA_001768895.1_ASM176889v1	Scaffold
	unclassified alpha	1313	93.5252	Alphaproteobacteria bacterium RIFCSPLOWO2_12_FULL_40_11	cbb3	0	0	0	1		no	no	0	#REF!	#REF!	no	GCA_001768925.1_ASM176892v1	Scaffold
	unclassified alpha	1536	90.6475	Alphaproteobacteria bacterium RIFCSPLOWO2_12_FULL_42_29	COX	1	0	0	0		no	no	0	#REF!	#REF!	no	GCA_001768955.1_ASM176895v1	Scaffold
	unclassified alpha	2107	93.5252	Thermopetrobacter sp. TC1	cbb3	0	0	0	1		no	no	1	#REF!	#REF!	yes	GCF_000746275.1_ASM74627v1	Scaffold
				#% ba3 verified by DeltBLAST of AGS20848 sub. 1 ba3 of Rhizobium etli bv. mimosae str. Mim1	**COX verfied by DeltaBLAST of COX1 Reyranella or OJV13907
					bo3, verified bo3 oxidase	also vs. OFW73472
				for AOX , used DeltaBLAST of KJV09818 Elstera	**cbb3 verified by DeltaBLAST of subunit I cbb3 oxidase of Roseospirillum

## Sheet: acessions
			% complet. *		file: 02Mauroproject	Genome	Assembly	COX/bo3/aa3/ba3/caa3	C/cbb3	NOR
class	order	total						some with subunit III also fused
alphabetical	alphabetical	proteins
					organism
alpha	Caulobacterales	2454	86.3		Caulobacterales bacterium RIFCSPHIGHO2_01_FULL_67_30	GCA_001796015.1_ASM179601v1	Scaffold	OGN48864.1;OGN48479.1	-	-
	Caulobacterales	2831	95.6835		Caulobacterales bacterium RIFCSPHIGHO2_01_FULL_70_19	GCA_001794825.1_ASM179482v1	Scaffold	OJU72266.1;OJU69766.1	OJU68437.1	-
	Holosporales/Rickettsiales	2344	81.295		Holospora undulata HU1	GCA_000388175.3_ASM38817v3	Scaffold	KPQ07868.1;KPQ05460.1	KPQ07793.1	-
	Holosporales/Rickettsiales	2990	96.4029		endosymbiont of Acanthamoeba sp. UWC8	GCA_000730245.1_ASM73024v1	Complete Genome	OAN69912.1	OAN67367.1	-
	Magnetococcales	3766	100 (94.2)		Magnetococcus marinus	GCA_000014865.1_ASM1486v1	Complete Genome	ETA52940.1;ETA51149.1	ETA50327.1	-
	Micavibrio	2432	100		Micavibrio aeruginosavorus ARL-13	GCA_000226315.1_ASM22631v1	Complete Genome	AEP08601.1	-	-
	Pelagibacterales	2811	91.3669		alpha proteobacterium HIMB5	GCA_000299095.1_ASM29909v1	Complete Genome	WP_024577228.1;WP_024575838.1	WP_024576625.1	-
	Pelagibacterales	1370	87.7698		Pelagibacteraceae bacterium GOM-A1	GCA_001704065.1_ASM170406v1	Contig	SEO82950.1;SEP47545.1;SEP36484.1	SEO06988.1	-
	Rhizobiales	4677	100 (96.4)		Aureimonas sp. AU40	GCF_001463785.1_ASM146378v1	Contig	KFG67334.1;KFG69673.1;KFG67715.1	KFG70890.1	KFG69061.1
	Rhizobiales	7978	97.8417		Aureimonas sp. Leaf324	GCA_001423245.1_Leaf324	Contig	WP_024878727.1	WP_024878576.1	-
	Rhizobiales	4190	96.4029		Aureimonas sp. N4	GCF_001463925.1_ASM146392v1	Contig	WP_026784009.1	WP_026782039.1	-
	Rhizobiales	8437	97.8417		Aureimonas sp. Leaf454	GCA_001424685.1_Leaf454	Contig	WP_036294648.1	WP_036294334.1	-
	Rhizobiales	5976	97.8417		Beijerinckia sp. 28-YEA-48	GCA_900104955.1_IMG-taxon_2693429820_annotated_assembly	Contig	OBQ88286.1;OBQ91283.1;OBQ90242.1;OBQ92984.1;OBQ94113.1	OBQ92051.1	-
	Rhizobiales	9403	95.6835		Afipia sp. P52-10	GCA_000516555.1_P52-10	Contig	OJW61473.1	OJW65934.1;OJW65172.1	OJW65906.1
	Rhizobiales	3198	87.7698		Afipia sp. 64-13	GCA_001897755.1_ASM189775v1	Scaffold	WP_061975625.1;WP_062111822.1;WP_062112155.1;WP_062113086.1;WP_062115414.1	-	-
	Rhizobiales	4622	97.8417		Afipia sp. NBIMC_P1-C1	GCF_000568595.1_NBIMC_P1-C1	Contig	KQQ91155.1;KQQ81838.1;KQQ90373.1	-	-
	Rhizobiales	4621	97.8417		Afipia sp. NBIMC_P1-C2	GCF_000568615.1_NBIMC_P1-C2	Contig	WP_058600529.1;WP_058599343.1;WP_062232026.1	-	-
	Rhizobiales	4752	97.8417		Afipia sp. OHSU_I-C4	GCF_000497635.1_OHSU_J-C4	Contig	KQT54701.1;KQT53105.1;KQT52734.1;KQT52706.1	KQT54395.1	-
	Rhizobiales	4752	97.8417		Afipia sp. OHSU_II-C1	GCF_000497575.1_OHSU_S-C1	Contig	SEC98545.1;SEB71790.1	SED92173.1	-
	Rhizobiales	4749	97.8417		Afipia sp. OHSU_II-C2	GCF_000497595.1_OHSU_S-C2	Contig	ETR77203.1;ETR79259.1;ETR78760.1	-	-
	Rhizobiales	8796	95.6835		Afipia sp. Root123D2	GCA_001425835.1_Root123D2	Contig	WP_006022898.1;WP_024921659.1;WP_006019427.1	WP_034459271.1	-
	Rhizobiales	8044	97.1223		Bosea sp. AAP35	GCA_001295925.1_ASM129592v1	Contig	KSV67971.1;KSV72273.1;KSV70136.1;KSV78161.1	KSV65786.1	KSV70166.1
	Rhizobiales	10155	97.1223		Bosea sp. PAMC 26642	GCA_001562255.1_ASM156225v1	Complete Genome	ODR95008.1;ODR94896.1;ODR95296.1	-	-
	Rhizobiales	4144	96.4029		Bosea sp. 117	GCF_000702305.1_ASM70230v1	Scaffold	OJU47561.1;OJU52093.1	OJU48241.1	-
	Rhizobiales	7750	96.4029		Bosea sp. Leaf344	GCA_001426225.1_Leaf344	Scaffold	ODA67229.1;ODA66762.1;ODA67398.1	-	-
	Rhizobiales	5116	97.8417		Bosea sp. UNC402CLCol	GCF_000745475.1_ASM74547v1	Scaffold	BAQ16602.1;BAQ16447.1;BAQ16438.1	BAQ16761.1	-
	Rhizobiales	1685	96.4029		Candidatus Tokpelaia hoelldoblerii	GCA_002005325.1_ASM200532v1	Complete Genome	OJY06439.1;OJY06907.1	-	-
	Rhizobiales	7786	96.4029		Bradyrhizobium sp. Ai1a-2	GCF_000426245.1_ASM42624v1	Scaffold	OJY00133.1	-	-
	Rhizobiales	7728	97.1223		Bradyrhizobium sp. NAS96.2	GCA_001908235.1_ASM190823v1	Contig	OJY38080.1	OJY37049.1;OJY35981.1	-
	Rhizobiales	7721	96.4029		Bradyrhizobium sp. LTSPM299	GCA_000938235.1_ASM93823v1	Scaffold	OJY13895.1;OJY11530.1	OJY14029.1	-
	Rhizobiales	3023	74.1007		Nitrobacter sp. 62-13	GCA_001896955.1_ASM189695v1	Scaffold	WP_020697179.1;WP_020699349.1	WP_020694279.1;WP_043283581.1	-
	Rhizobiales	3304	85.6115		Nitrobacter sp. 62-23	GCA_001897285.1_ASM189728v1	Scaffold	OJY70457.1	OJY65432.1;OJY71937.1	-
	Rhizobiales	4236	97.1223		Bradyrhizobiaceae bacterium SG-6C	GCA_000219645.1_ASM21964v1	Chromosome	-	SDG73749.1	-
	Rhizobiales	4437	97.1223		Variibacter gotjawalensis	Variibacter_gotjawalensis	Complete Genome	-	OFX09407.1	-
	Rhizobiales	4825	97.8417		Rhodopseudomonas pseudopalustris	GCA_900110435.1_IMG-taxon_2671180228_annotated_assembly	Scaffold	OLB76077.1;OLB71953.1	-	-
	Rhizobiales	5375	97.8417		Rhodopseudomonas sp. AAP120	GCA_001295845.1_ASM129584v1	Contig	OJU56338.1	-	-
	Rhizobiales	4706	96.4029		Ochrobactrum sp. P6BS-III	GCA_002016635.1_ASM201663v1	Contig	OJW23156.1;OJW29577.1	OJW27840.1	OJW29330.1
	Rhizobiales	3285	94.964		Pseudochrobactrum sp. AO18b	GCF_000409565.1_AO18b	Contig	-	-	-
	Rhizobiales	4804	96.4029		Cohaesibacter marisflavi	GCA_900115225.1_IMG-taxon_2617270874_annotated_assembly	Scaffold	SCC82605.1;SCC81682.1	SCC81781.1	-
	Rhizobiales	3772	97.8417		Devosia sp. 63-57	GCA_001899045.1_ASM189904v1	Scaffold	ANK79693.1	ANK81677.1	ANK82038.1
	Rhizobiales	5411	97.1223		Devosia sp. 66-14	GCA_001899085.1_ASM189908v1	Scaffold	SDR63558.1;SDR25844.1;SDR57008.1	-	-
	Rhizobiales	4223	94.2446		Devosia sp. 66-22	GCA_001899065.1_ASM189906v1	Scaffold	WP_075217001.1;WP_075214058.1;WP_075215482.1	WP_075214957.1	-
	Rhizobiales	4052	97.8417		Devosia sp. 67-54	GCA_001899075.1_ASM189907v1	Scaffold	SEC16781.1;SED87584.1	-	-
	Rhizobiales	4296	100 (97.8)		Devosia sp. H5989	GCA_001185205.1_ASM118520v1	Complete Genome	SED06543.1;SEE62070.1	-	-
	Rhizobiales	3690	97.8417		Devosia sp. Root436	GCA_001426345.1_Root436	Scaffold	-	ADE84915.1	-
	Rhizobiales	7148	97.8417		Devosia sp. Root635	GCA_001427605.1_Root635	Scaffold	OJY27401.1	OJY36367.1;OJY30720.1	OJY34953.1
	Rhizobiales	3687	97.8417		Devosia sp. YR412	GCA_900110945.1_IMG-taxon_2690315612_annotated_assembly	Contig	WP_069299219.1;WP_069300436.1	WP_069298855.1	-
	Rhizobiales	3726	97.1223		Hyphomicrobium sp. CS1GBMeth3	GCF_900117455.1_CS1GBMeth3	Contig	-	KPQ16054.1	-
	Rhizobiales	5400	97.1223		Hyphomicrobium sp. CS1BSMeth3	GCF_900117415.1_CS1BSMeth3_assembly_1	Contig	KPP85948.1	KPP85903.1	KPP80931.1
	Rhizobiales	7042	100 (97.8)		Rhodoplanes sp. Z2-YC6860	GCA_001579845.1_ASM157984v1	Complete Genome	GAN00147.1	GAM98174.1	-
	Rhizobiales	3802	84.8921		Pelagibacterium sp. SCN 63-126	GCA_001724555.1_ASM172455v1	Contig	OHC79311.1;OHC78044.1;OHC78315.1	OHC76798.1	-
	Rhizobiales	7592	94.964		Pelagibacterium sp. SCN 64-44	GCA_001724955.1_ASM172495v1	Scaffold	OAN55704.1;OAN63197.1	OAN54181.1	OAN50085.1
	Rhizobiales	4135	97.1223		Methylobacterium sp. Leaf100	GCA_001422845.1_Leaf100	Scaffold	OAH06778.1	-	-
	Rhizobiales	6300	97.1223		Methylobacterium sp. 190mf	Methylobacterium_sp._190mf	Contig	ERL98298.1	-	-
	Rhizobiales	4632	97.1223		Microvirga sp. BSC39	GCA_000739015.1_ASM73901v1	Contig	WP_027298643.1;WP_027301395.1	-	-
	Rhizobiales	4199	95.6835		Methylocystis sp. LW5	GCF_000685825.1_ASM68582v1	Contig	OHC51846.1;OHC58500.1	OHC52305.1	-
	Rhizobiales	4529	97.8417		Methylosinus sp. PW1	GCF_000745215.1_ASM74521v1	Contig	EHL96563.1;EHM02729.1;EHM02611.1;EHM02437.1;EHM02738.1	-	-
	Rhizobiales	3958	96.4029		Pleomorphomonas koreensis	GCF_000425185.1_ASM42518v1	Scaffold	-	SDD95809.1	-
	Rhizobiales	6970	98.5612		Terasakiella sp. PR1	GCA_900093605.1_Terasakiella_magnetica_strain_PR1	Contig	-	OFW79887.1	-
	Rhizobiales	4460	97.8417		Phyllobacterium sp. CL33Tsu	GCA_900113985.1_IMG-taxon_2639762575_annotated_assembly	Contig	-	EPY02852.1	-
	Rhizobiales	3670	78.4173		Hoeflea sp. BRH_c9	GCA_000961635.1_41k	Contig	KPP93805.1	KPP93156.1	-
	Rhizobiales	5582	97.8417		Mesorhizobium sp. AA23	GCA_001672435.1_AA23	Contig	-	OIQ07025.1	-
	Rhizobiales	3502	77.6978		Mesorhizobium sp. 61-13	GCA_001897075.1_ASM189707v1	Scaffold	EBA03862.1	EBA03098.1	-
	Rhizobiales	7427	96.4029		Sinorhizobium sp. GL2	GCA_001461715.1_ASM146171v1	Contig	OFW93018.1	-	-
	Rhizobiales	5972	95.6835		Methyloligella halotolerans	GCA_001708935.1_Meth_hal_C2_1.0	Contig	OHC57300.1;OHC60750.1	OHC61105.1	-
	Rhizobiales	5596	74.1007		Methyloceanibacter stevinii	GCA_001723355.1_ASM172335v1	Contig	OHC74238.1;OHC74950.1;OHC73785.1	OHC76263.1	-
	Rhizobiales	6494	95.6835		Methyloceanibacter caenitepidi	GCA_000828475.1_ASM82847v1	Complete Genome	OHC82257.1	OHC83033.1	-
	Rhizobiales	3080	98.5612		Roseospirillum parvum	GCA_900100455.1_IMG-taxon_2675903017_annotated_assembly	Scaffold	OFX07162.1	-	-
	Rhizobiales	5228	90.6475		Rhizobiales bacterium 62-17	GCA_001898965.1_ASM189896v1	Scaffold	-	-	-
	Rhizobiales	4486	97.1223		Rhizobiales bacterium 62-47	GCA_001899255.1_ASM189925v1	Scaffold	-	-	-
	Rhizobiales	3924	91.3669		Rhizobiales bacterium 65-9	GCA_001899525.1_ASM189952v1	Scaffold	-	-	-
	Rhizobiales	4266	96.4029		Rhizobiales bacterium 64-17	GCA_001899285.1_ASM189928v1	Scaffold	-	-	-
	Rhizobiales	4788	89.9281		Rhizobiales bacterium 65-79	GCA_001896885.1_ASM189688v1	Scaffold	-	-	-
	Rhizobiales	3742	90.6475		Rhizobiales bacterium 63-22	GCA_001898995.1_ASM189899v1	Scaffold	-	-	-
	Rhizobiales	4877	97.1223		Rhizobiales bacterium 63-7	GCA_001897115.1_ASM189711v1	Scaffold	-	-	-
	Rhizobiales	3849	97.8417		Rhizobiales bacterium HL-109	GCA_900094735.1_IMG-taxon_2634166172_annotated_assembly	Contig	KJV69522.1;KJV69456.1	-	-
	Rhizobiales	4323	97.8417		Rhizobiales bacterium NRL2	GCA_001664005.1_ASM166400v1	Complete Genome	WP_025898142.1	WP_037492641.1	-
	Rhizobiales	9156	97.8417		Rhizobiales bacterium GAS113	GCA_900103895.1_IMG-taxon_2693430035_annotated_assembly	Contig	-	-	-
	Rhizobiales	4400	97.8417		Rhizobiales bacterium MIMtkB18	GCF_001927285.1_ASM192728v1	Contig	AIL65753.1	-	-
	Rhizobiales	8053	97.8417		Rhizobiales bacterium GAS188	GCA_900104855.1_IMG-taxon_2693429787_annotated_assembly	Contig	-	-	-
	Rhizobiales	8956	97.8417		Rhizobiales bacterium GAS191	GCA_900105365.1_IMG-taxon_2690315650_annotated_assembly	Contig	-	-	-
	Rhizobiales/Rhodobacterales	7239	97.1223		Rhodovulum sp. ES.010	GCA_900142935.1_IMG-taxon_2703719235_annotated_assembly	Contig	OFW95952.1	OFW94049.1	-
	Rhodobacterales	3642	97.8417		Rhodobacter capsulatus SB 1003	GCA_000021865.1_ASM2186v1	Complete Genome	WP_067405861.1	WP_067402461.1	-
	Rhodobacterales	4470	95.6835		Rhodobacterales bacterium 65-51	GCA_001898985.1_ASM189898v1	Scaffold	OJJ13189.1;OJJ09144.1	OJJ13461.1	-
	Rhodobacterales	3513	93.5252		Rhodobacteraceae bacterium CY02	GCF_001719615.1_ASM171961v1	Contig	KQY70698.1;KQY70586.1	KQY68422.1;KQY69645.1	-
	Rhodobacterales	3813	96.4029		Rhodobacteraceae bacterium EhC02	GCA_001650895.1_ASM165089v1	Scaffold	KPP93376.1;KPP88614.1	KPP93858.1	-
	Rhodobacterales	3501	76.9784		Rhodobacteraceae bacterium GWF1_65_7	GCA_001828845.1_ASM182884v1	Scaffold	KUO57523.1;KUO57373.1	KUO56800.1	-
	Rhodobacterales	3197	97.8417		Rhodobacteraceae bacterium HL-91 or Roseibaca calidilacus	GCA_001517585.1_IMG-taxon_2603880215_annotated_assembly	Contig	OHC94473.1;OHC97805.1	OHC99358.1	-
	Rhodobacterales	3684	97.1223		Rhodobacteraceae bacterium HLUCCA08	GCA_001314655.1_ASM131465v1	Scaffold	OHC92520.1;OHC96867.1	OHC92081.1	-
	Rhodobacterales	3603	97.1223		Rhodobacteraceae bacterium HLUCCA12	GCA_001314715.1_ASM131471v1	Scaffold	KPF73503.1	KPF80152.1	-
	Rhodobacterales	3304	97.1223		Rhodobacteraceae bacterium HLUCCO07	GCA_001314705.1_ASM131470v1	Scaffold	ERL46343.1	-	-
	Rhodobacterales	3678	97.1223		Rhodobacteraceae bacterium HLUCCO18	GCA_001314805.1_ASM131480v1	Scaffold	-	WP_051928697.1	WP_038034830.1
	Rhodobacterales	4632	97.1223		Rhodobacteraceae bacterium PD-2	GCA_000504185.2_ASM50418v2	Scaffold	EDP66494.1	-	-
	Rhodobacterales	4179	96.4029		Rhodobacteraceae bacterium HTCC2083	GCA_000156115.1_ASM15611v1	Scaffold	WP_029640283.1	WP_029638220.1	WP_029639046.1
	Rhodobacterales	3667	96.4029		Rhodobacteraceae bacterium HTCC2150	GCA_000169395.1_ASM16939v1	Contig	KPF86120.1	KPF82514.1;KPF83622.1	-
	Rhodobacterales	1689	75.5396		Rhodobacteraceae bacterium CG2_30_10_405	GCA_001873855.1_ASM187385v1	Scaffold	WP_022692686.1;WP_022691155.1	WP_022692475.1	-
	Rhodobacterales	6235	96.4029		Rhodobacteraceae bacterium HIMB11	GCA_000472185.1_HIMB11v1.0	Contig	OJW72180.1;OJW57062.1	OJW59392.1	-
	Rhodobacterales	6923	97.8417		Rhodobacteraceae bacterium SB2	GCA_001642945.1_ASM164294v1	Contig	WP_017505719.1;WP_017504039.1;WP_017506079.1	-	-
	Rhodospirillales	1751	72.6619		Rhodospirillales bacterium RIFCSPLOWO2_12_FULL_67_15	GCA_001830475.1_ASM183047v1	Scaffold	-	-	-
	Rhodospirillales	2558	89.9281		Rhodospirillales bacterium RIFCSPLOWO2_02_FULL_58_16	GCA_001830425.1_ASM183042v1	Scaffold	KUO66557.1;KUO56394.1	KUO54409.1	KUO58476.1
	Rhodospirillales	4632	97.1223		Rhodobacterales bacterium RIFCSPHIGHO2_02_FULL_62_130	GCA_001828855.1_ASM182885v1	Scaffold	OJV47657.1	-	OJV46364.1
	Rhodospirillales	4627	97.1223		Rhodobacterales bacterium RIFCSPHIGHO2_12_FULL_62_75	GCA_001828895.1_ASM182889v1	Scaffold	GAK34107.1	GAK33096.1	-
	Rhodospirillales	5289	97.8417		Acetobacteraceae bacterium AT-5844	GCA_000245075.1_ASM24507v1	Scaffold	AFS46890.1	-	-
	Rhodospirillales	6061	97.1223		Rhodospirillales bacterium URHD0088	GCF_000518365.1_ASM51836v1	Scaffold	-	OFW86994.1	-
	Rhodospirillales	5250	96.4029		Reyranella massiliensis	GCF_000312425.1_ASM31242v1	Scaffold	ANA12679.1;ANA14072.1	-	ANA15117.1
	Rhodospirillales	4448	97.1223		Rhodospirillales bacterium 70-18	GCA_001899585.1_ASM189958v1	Scaffold	OFX02911.1;OFW98071.1	OFX06609.1	-
	Rhodospirillales	5253	94.2446		Rhodospirillales bacterium 69-11	GCA_001898425.1_ASM189842v1	Scaffold	OJU41623.1;OJU34440.1	OJU36179.1	OJU32666.1;OJU36519.1
	Rhodospirillales	7973	97.1223		Rhodospirillales bacterium URHD0017	GCA_900110395.1_IMG-taxon_2590828823_annotated_assembly	Scaffold	OFW73472.1	-	-
	Rhodospirillales	2588	92.0863		Rhodospirillales bacterium RIFCSPLOWO2_12_FULL_58_28	GCA_001830455.1_ASM183045v1	Scaffold	OIN85580.1	OIN86799.1	-
	Rhodospirillales	7540	97.8417		Magnetospirillum moscoviense	GCA_001650635.1_ASM165063v1	Contig	EDZ42027.1;EDZ44233.1	EDZ40798.1	-
	Rhodospirillales	3424	82.0144		Rhodospirillaceae bacterium BRH_c57	GCA_000961745.1_41k	Contig	OJW51436.1	-	-
	Rhodospirillales	3462	98.56/97.3#		Phaeospirillum fulvum MGU-K5	GCA_000442515.1_PhaespirillumFulvum_1.0	Contig	KJS37194.1;KJS34472.1	-	KJS38962.1
	Rhodospirillales	3703	97.8417		Rhodospira trueperi	GCA_900101965.1_IMG-taxon_2675903020_annotated_assembly	Scaffold	-	-	-
	Rhodospirillales	3779	98.5612		Zymomonas mobilis subsp. mobilis NCIMB 11163	GCA_000024245.1_ASM2424v1	Complete Genome	OJV13907.1;OJV15789.1	-	-
	Rhodospirillales	5570	98.5612		Acetobacter sp. SLV-7	GCA_001628715.1_ASM162871v1	Complete Genome
	Rhodospirillales	1727	94.2446		Acetobacter sp. 46_36	GCA_001917135.1_ASM191713v1	Scaffold	OGN43149.1	OGN43972.1	OGN43989.1
	Rhodospirillales	1479	90.6475		Acidiphilium sp. CAG:727	GCA_000437515.1_MGS727	Scaffold	OCW78466.1	-	-
	Rhodospirillales	1538	91.3669		Acetobacter sp. CAG:267	GCA_000434135.1_MGS267	Scaffold	-	-	-
	Rhodospirillales	1603	95.0/97.3#		Alphaproteobacteria bacterium GWF2_58_20	GCA_001768735.1_ASM176873v1	Scaffold	SFO13560.1	SFN96548.1	SFP19895.1
	Rhodospirillales	1775	89.21/...#		Acetobacter sp. CAG:977	GCA_000434295.1_MGS977	Scaffold	-	AIF81773.1	-
	Rhodospirillales	1791	95.6835		Azospirillum sp. CAG:239	GCA_000436375.1_MGS239	Scaffold	SFI55065.1;SFJ45349.1	-	-
	Rhodospirillales	1781	95.6835		Azospirillum sp. 47_25	GCA_001917125.1_ASM191712v1	Scaffold	-	SIO53082.1	-
	Rhodospirillales	1902	94.964		Azospirillum sp. 51_20	GCA_001917175.1_ASM191717v1	Scaffold	SCA54874.1;SCA54868.1	SCA56461.1	-
	Rhodospirillales	1762	94.964		Azospirillum sp. CAG:260	GCA_000436195.1_MGS260	Scaffold	KJS10172.1	KJS17379.1;KJS10166.1	KJS18673.1
	Rhodospirillales	5669	100		Azospirillum brasilense sp7	GCA_001315015.1_ASM131501v1	Complete Genome	WP_035676479.1, WP_035682442.1,WP_035674796.1	-	WP_059398493.1
	Rhodospirillales	4574	100		Caenispirillum salinarum AK4	GCA_000315795.1_Caenispirillum_salinarum	Contig	EKV31466.1,EKV31787.1,EKV29538.1	EKV32365.1	EKV27600.1
	Rhodospirillales	5186	94.2446		Candidatus Endolissoclinum sp. TMED37	GCA_002167635.1_ASM216763v1	Contig	OUU13428.1	-	OUU30534.1
	Rhodospirillales	5596	100		Dongia sp. URHE0060	GCF_000620685.1_ASM62068v1	Scaffold	WP_028099104.1, WP_028095726.1, WP_051562130.1	-	-
	Rhodospirillales	6775	100		Inquilinus limosus DSM 16000	GCA/GCF_000423185.1_ASM42318v1	Scaffold	ALJ38155, WP_035676479 WP_035682442, WP_035674796	WP_059398493
	Rhodospirillales	3356	97.84		Magnetospirillum moscoviense	GCA_001746755.1_ASM174675v1	Contig	OEJ67148.1,OEJ69595.1	OEJ67564.1
	Rhodospirillales	3775	100		Magnetospira sp. QH2	GCA_000968135.1_ASM96813v1	Complete Genome	CCQ74686.1	CCQ72120.1	CCQ73137.1
	Rickettsiales	1070	85.6115		Candidatus Hepatobacter penaei	GCF_000742475.1_ASM74247v1	Scaffold	OJY42319.1	OJY45404.1	-
	Rickettsiales	1924	94.964		Candidatus Neoehrlichia lotoris	GCA_000964795.1_ASM96479v1	Contig	OJU01967.1;OJU04399.1	OJU02990.1;OJU02451.1	-
	Rickettsiales	3419	97.8417		Rickettsiales bacterium Ac37b	GCA_000746585.2_ASM74658v2	Complete Genome	-	-	-
	Sneathelliales	3178	83.4532		Sneathiella glossodoripedis	GCF_000616095.1_ASM61609v1	Contig	OFW82322.1	-	-
	Sphingomonadales	3084	97.8417		Erythrobacteraceae bacterium CCH12-C2	GCF_001556995.1_ASM155699v1	Contig	-	OHC48752.1	OHC49259.1
	Sphingomonadales	4209	80.5755		Sphingomonas-like bacterium B12	GCF_000333335.1_ASM33333v1	Contig	OFX00143.1	OFX04417.1	-
	Sphingomonadales	9901	97.8417		Sphingomonas sp. Root50	GCA_001426825.1_Root50	Scaffold	-	OFX11976.1	-
	Sphingomonadales	2870	98.5612		Erythrobacteraceae bacterium HL-111	GCA_001314765.1_ASM131476v1	Scaffold	CUX80282.1	CUX79487.1	-
	Sphingomonadales	2031	82.7338		Sphingomonadales bacterium BRH_c42	GCA_001516125.1_41k	Contig	OFX08092.1	-	-
	Sphingomonadales	3106	94.2446		Sphingomonadales bacterium 63-6	GCA_001898545.1_ASM189854v1	Scaffold	OFW91708.1	-	-
	Sphingomonadales	3487	97.1223		Sphingomonadales bacterium RIFCSPLOWO2_12_FULL_63_15	GCA_001829085.1_ASM182908v1	Scaffold	OFW86148.1	-	-
	Sphingomonadales	3909	97.1223		Sphingomonadales bacterium RIFCSPHIGHO2_01_FULL_65_20	GCA_001829075.1_ASM182907v1	Scaffold	OFW68082.1	-	-
	unclassified alpha	6183	95.6835		alpha proteobacterium AAP81b	GCA_001295935.1_ASM129593v1	Contig	WP_024577228.1;WP_024575838.1	WP_024576625.1	-
	unclassified alpha	3752	97.8417		alpha proteobacterium RS24	GCA_000469155.1_RS24	Contig	WP_029354309.1;WP_029355666.1	WP_051660866.1	-
	unclassified alpha	2107	93.5252		Thermopetrobacter sp. TC1	GCF_000746275.1_ASM74627v1	Scaffold	-	OFW93913.1	-
	unclassified alpha	3647	96.4029		alpha proteobacterium Mf 1.05b.01	GCF_000509225.1_ASM50922v1	Contig	KPF66458.1	KPF62134.1	-
	unclassified alpha	4576	97.8417		alpha proteobacterium AAP38	GCA_001296005.1_ASM129600v1	Contig	WP_006022898.1;WP_024921659.1;WP_006019427.1	WP_034459271.1	-
	unclassified alpha	6128	97.8417		alpha proteobacterium BAL199	GCA_000171835.1_ASM17183v1	Contig	WP_024577228.1;WP_024575838.1	WP_024576625.1	-
	unclassified alpha	2609	97.8417		alpha proteobacterium L41A	GCF_000335735.1_L41A.1.0	Contig	KQW21268.1	KQW23405.1	-
	unclassified alpha	4802	97.1223		Alphaproteobacteria bacterium AO1-B	GCA_001890945.1_ASM189094v1	Contig	EGP09155.1	EGP08175.1	-
	unclassified alpha	1422	94.2446		Alphaproteobacteria bacterium 43-37	GCA_001897475.1_ASM189747v1	Scaffold	KJC57966.1;KJC60449.1;KJC56674.1;KJC56046.1;KJC62282.1	-	-
	unclassified alpha	5465	96.4029		alpha proteobacterium Q-1	GCA_000710935.1_ASM71093v1	Contig	AMJ58965.1;AMJ62988.1	-	-
	unclassified alpha	4196	97.8417		alpha proteobacterium U9-1i	GCA_000974665.1_ASM97466v1	Contig	KQU55086.1	KQU52450.1	-
	unclassified alpha	5670	89.9281		Alphaproteobacteria bacterium 13_2_20CM_2_64_7	GCA_001915105.1_ASM191510v1	Scaffold	WP_038360928.1;WP_038365585.1	-	-
	unclassified alpha	2127	78.4173		Alphaproteobacteria bacterium 62-8	GCA_001898015.1_ASM189801v1	Scaffold	OJU25835.1;OJU25010.1;OJU27443.1	-	-
	unclassified alpha	947	82.0144		Alphaproteobacteria bacterium 40-19	GCA_001898075.1_ASM189807v1	Scaffold	WP_027581428.1;WP_027580438.1;WP_027583306.1;WP_027579538.1;WP_027583223.1	WP_043159075.1	WP_027578879.1
	unclassified alpha	2526	91.3669		Alphaproteobacteria bacterium 41-28	GCA_001897795.1_ASM189779v1	Scaffold	OKO72451.1;OKO79769.1;OKO71126.1;OKO80181.1	OKO72640.1;OKO80366.1	-
	unclassified alpha	6461	75.5396		Alphaproteobacteria bacterium 65-37	GCA_001897995.1_ASM189799v1	Scaffold	OJV01465.1;OJV02879.1	-	-
	unclassified alpha	3933	71.9424		Alphaproteobacteria bacterium RIFCSPHIGHO2_12_FULL_66_14	GCA_001767945.1_ASM176794v1	Scaffold	WP_072395017.1;WP_072394827.1;WP_072395393.1;WP_072396285.1	WP_072392261.1	-
	unclassified alpha	3280	83.4532		Alphaproteobacteria bacterium BRH_c36	GCA_001516065.1_ASM151606v1	Contig	BAT58773.1;BAT61616.1	-	-
	unclassified alpha	1983	96.4029		Alphaproteobacteria bacterium CG1_02_46_17	GCA_001871905.1_ASM187190v1	Scaffold	SEO96102.1;SEP24075.1	SEO97702.1	-
	unclassified alpha	894	89.9281		Alphaproteobacteria bacterium GWA1_45_9	GCA_001767775.1_ASM176777v1	Scaffold	KPG02163.1;KPF98843.1;KPF97603.1;KPG01613.1	KPG00499.1	KPG01493.1
	unclassified alpha	1472	76.9784		Alphaproteobacteria bacterium GWA2_41_27	GCA_001768725.1_ASM176872v1	Scaffold	OOL18714.1;OOL19377.1;OOL20012.1	OOL18616.1	-
	unclassified alpha	1964	93.5252		Alphaproteobacteria bacterium RIFCSPHIGHO2_02_FULL_46_13	GCA_001767915.1_ASM176791v1	Scaffold	OJX19667.1;OJX18936.1;OJX19127.1	OJX19302.1	OJX19104.1
	unclassified alpha	1447	72.6619		Alphaproteobacteria bacterium RIFCSPHIGHO2_12_FULL_45_9	GCA_001768875.1_ASM176887v1	Scaffold	KRA56008.1	KRA43209.1	-
	unclassified alpha	987	74.8201		Alphaproteobacteria bacterium RIFCSPLOWO2_02_42_7	GCA_001767995.1_ASM176799v1	Scaffold	AMN41149.1;AMN44804.1	AMN45005.1	-
	unclassified alpha	1504	89.9281		Alphaproteobacteria bacterium RIFCSPLOWO2_02_FULL_43_54	GCA_001768895.1_ASM176889v1	Scaffold	ODT83404.1;ODT76681.1;ODT80798.1	ODT78041.1;ODT77581.1;ODT77960.1;ODT77058.1	-
	unclassified alpha	1549	92.0863		Alphaproteobacteria bacterium RIFCSPHIGHO2_12_42_13	GCA_001768825.1_ASM176882v1	Scaffold	AKR54483.1	-	-
	unclassified alpha	1524	90.6475		Alphaproteobacteria bacterium RIFCSPHIGHO2_12_FULL_42_100	GCA_001768845.1_ASM176884v1	Contig	KQX34832.1	KQX38144.1	-
	unclassified alpha	1528	92.0863		Alphaproteobacteria bacterium RIFCSPHIGHO2_02_FULL_42_30	GCA_001767885.1_ASM176788v1	Contig	OJX48520.1;OJX51274.1	OJX48584.1	-
	unclassified alpha	1536	90.6475		Alphaproteobacteria bacterium RIFCSPLOWO2_12_FULL_42_29	GCA_001768955.1_ASM176895v1	Scaffold	SEF57276.1;SEG29211.1;SEF88413.1	-	-
	unclassified alpha	1445	92.0863		Alphaproteobacteria bacterium GWC2_42_16	GCA_001767835.1_ASM176783v1	Scaffold	WP_022711681.1;WP_022710231.1	WP_022710270.1	-
	unclassified alpha	1503	89.9281		Alphaproteobacteria bacterium RBG_16_42_14	GCA_001768775.1_ASM176877v1	Scaffold	OJX42737.1;OJX42036.1	OJX44325.1;OJX41762.1	-
	unclassified alpha	1313	93.5252		Alphaproteobacteria bacterium RIFCSPLOWO2_12_FULL_40_11	GCA_001768925.1_ASM176892v1	Scaffold	KQP36477.1;KQP31464.1;KQP27081.1	-	-
	unclassified alpha	3044	72.6619		Alphaproteobacteria bacterium RIFCSPHIGHO2_12_FULL_63_12	GCA_001767925.1_ASM176792v1	Scaffold	SEP84631.1;SEQ41666.1;SEP64251.1	-	-
	unclassified alpha	1322	95.6835		Alphaproteobacteria bacterium RIFCSPHIGHO2_02_FULL_40_34	GCA_001767865.1_ASM176786v1	Scaffold	OJX22490.1;OJX22883.1	OJX27450.1	-
	unclassified alpha	1333	95.6835		Alphaproteobacteria bacterium RIFCSPLOWO2_01_FULL_40_26	GCA_001767955.1_ASM176795v1	Scaffold	WP_072385501.1;WP_072386237.1;WP_072394648.1;WP_072388750.1	-	-
	unclassified alpha	1353	95.6835		Alphaproteobacteria bacterium RIFCSPLOWO2_02_FULL_40_19	GCA_001768015.1_ASM176801v1	Scaffold	ODT47556.1;ODT48252.1	ODT51016.1;ODT51298.1	-
	unclassified alpha	1643	93.5252		Alphaproteobacteria bacterium 33-17	GCA_001897445.1_ASM189744v1	Scaffold	AQS41847.1;AQS42096.1	-	-
	Rhodospirales	3878	98.56		Rhodospirillum rubrum F11	GCA_000225955.1_ASM22595v1	Complete Genome	-	WP_011391079	-
alpha	Rhodospirillales	4351	100		Thalassospira xiamenensis M-5	GCA_900156715.1_IMG-taxon_2681813519_annotated_assembly	Contig
