# Supplementary material for: Oxygen Reductases in Alphaproteobacterial Genomes: Physiological Evolution From Low to High Oxygen Environments
Source: Front Microbiol. 2019 Mar 18;10:499. doi: 10.3389/fmicb.2019.00499 (PMC6431628; doi:10.3389/fmicb.2019.00499)
Supplement: Supplementary file 2 [file Table_2.xlsx]

## Sheet: Hoja3
Supplementary Table S2		Accessions											Accessions, in gene sequence order										vs. best presentation of 7 Nov sheet 2										vs. best presentation of 7 Nov sheet 2	Accessions										Accessions checked with Filipa file on 14 ad then 24 May	Accessions
	Pereira et al. (2001) family or type	bd		C			bd		A1				B		A2				A2				Pereira et al (2001) family or type	A1			A1
	traditional oxidase name	bd-I	bd-I	cbb3	cbb3	cbb3	bd	bd	ubiquinol oxidase				ba3	ba3	aa3				(c)aa3				terminal oxidase name	(c)aa3			aa3					AOX	enzyme	bc1			II				I	M/RQ	Q	enzyme or trait	FDR	FeFe-Hyd.	HydEFG	PFO/OAFO/PNO	PFL
	other definitions and family subtypes	Cyd		Fix, Cco			Cio		bo3 oxidase						CyoCAB				COX operon a-I				other classification	COX operon a, a-II & a-III			COX operon b						other name	ubiquinol-cytochrome c reductase			succinate dehydrogenase				NADH-Q reductase				fumarate reductase
	subunits	I	II	FixN	FixO	FixP	I	II	A	B	C	D	II	I	C	SCO	A	B	II-c	I	III	NrfD	subunits	II	I	III	II	I	CtaB	CtaG	III		subunits	ISP	b	c1	A	B	C	D	NuoA-N	Men A. B, C, D, F	UbiA, D, X, E, G, L or CoQ6, CoQ7, CoQ9	subunits	A(BCD)
alpha	organisms with near complete genome																						organisms with near complete genome										organisms with near complete genome										more information in Degli Esposti (2017)	organisms with near complete genome
I. No oxidases	anaerobes																						anaerobes										anaerobes											anaerobes
	Acetobacter sp. 46_36																						Acetobacter sp. 46_36										Acetobacter sp. 46_36											Acetobacter sp. 46_36		OLA65380	E, OLA64981; F, OLA66171 & G, OLA64751	OLA66212
	Azospirillum sp. CAG:239																						Azospirillum sp. CAG:239										Azospirillum sp. CAG:239								CDB54007 NuoE-like, CDB53276 NuoF-like, CDB52610 NuoN-like			Azospirillum sp. CAG:239		CDB53277	E, CDB54134; F, CDB53483 & G, CDB54364	CDB54180, partial; OLA80192 in closely related Azospirillum sp. 51_20	CDB53124.1
	Alphaproteobacteria bacterium GWF2_58_20																						Alphaproteobacteria bacterium GWF2_58_20									OFW82837	Alphaproteobacteria bacterium GWF2_58_20								OFW83685 NuoA partial, OFW83144 NuoB-like, OFW83684 NuoD-like, OFW83683 NuoE, OFW83140 NuoH-like, OFW83192 NuoL-like, ...OFW83142 & OFW83594 NuoM-like - Hydrogenase group 4 too		A, OFW8307; D, OFW82674; X, OFW82675; E, OFW83352; G, OFW84250.	Alphaproteobacteria bacterium GWF2_58_20		OFW84067		OFW84105
II. High affinity only																																	anaerobes
	Magnetococcus marinus			WP_011713974	WP_011713975	WP_011713976																	Magnetococcus marinus										Magnetococcus marinus	WP_011712054	ABK42883	WP_011712052	WP_011712126	WP_011712125			WP_011715174, WP_081436362, WP_011715172, WP_011715171 NuoD, WP_011715170, WP_011715169, WP_011715168 NuoG, WP_011715167 NuoH, WP_085987182, WP_011715165 NuoJ, WP_011715164, WP_011715163, WP_011715162, WP_011715161 NuoN		A, WP_011711939; D, WP_011711941; X, WP_011712504; E, WP_011715033; G, WP_011713759.	Magnetococcus marinus				ABK44249.1 (WP_011713397)
	Rhodospirillum rubrum F11			WP_011391079	WP_011391078	WP_011391077	WP_011388318	WP_011388319															Rhodospirillum rubrum F11										Rhodospirillum rubrum F11	WP_011388117	WP_011388116	WP_011388115	WP_011388959	WP_011388960	WP_011388957	WP_011388958	WP_011389430, WP_011389431, WP_011389432, ..33, ..34, ..35, ..36, ..37, ..38, ..39, WP_011389440, ..41, ..42, WP_011389443	RQ	A, WP_011388330; D, WP_011389173 & WP_011388332; X, WP_011389806; E, WP_011391545; G, WP_011388500; H, WP_011391454; L, AEO50253; CoQ7, ABC24292; CoQ9, WP_011388800 & WP_011391030.	Rhodospirillum rubrum F11	?	AEO46783.1 (WP_011388063)		AEO48929.1 (WP_011390151)	AEO49535.1;AEO47415.1
	Phaeospirillum fulvum MGU-K5	WP_021133524	WP_021133523	WP_021131144	WP_021131143	WP_021131142																	Phaeospirillum fulvum MGU-K5										Phaeospirillum fulvum MGU-K5	WP_021130829	WP_021130828	WP_021130828 fused	WP_021133416	WP_021133415	WP_021133418	WP_021133417	WP_021133356, WP_081673301, WP_021133354, WP_021133353, , WP_039853723 NuoL, WP_021133685 NuoM, WP_021133686 NuoN	WP_051185855 MenA, WP_021132051 MenB, WP_021132052 MenC, WP_081673218 MenD, WP_021132054 UbiE, WP_021132049 MenF.	A, WP_074769509; D, WP_074767888; X, WP_039852974; L, WP_021130841; CoQ9, WP_013066224.	Phaeospirillum fulvum MGU-K5	WP_021130489, WP_021130488, WP_021130487, WP_021130486	EPY00806.1, EPY03056.1 (WP_021130842)	E, EPY00808.1; F, EPY00809.1 WP_021133136 & G, EPY00811.1 WP_021133138	EPY01851.1 (WP_021132087)
	Roseospirillum parvum	WP_092621882	WP_092621879	WP_092616032	WP_092616029	WP_092616023																	Roseospirillum parvum										Roseospirillum parvum	WP_092615747	WP_092615744	WP_092615741	WP_092616054	WP_092616050	WP_092616060	WP_092616057	WP_092618898, SDH27960 NuoB, WP_092618901, WP_092618904,WP_092618908, WP_092618911, WP_092618914, WP_092618917, WP_092618920, WP_092619155, WP_092619157, WP_092618923, WP_092618926, WP_092618929	WP_092621746 MenA	A, WP_092619789; D, WP_092614697; X, WP_092615099; E, WP_092619977; G, WP_092614691; L, WP_092615437; CoQ7, WP_092617524; CoQ9, WP_092614038.	Roseospirillum parvum				SDH07863.1 (~ WP_092618324 - 5 a.a. shorter)
	Rhodobacter capsulatus SB 1003	WP_013068782	WP_01306878	WP_013066894	WP_013066895	WP_013066896																	Rhodobacter capsulatus SB 1003										Rhodobacter capsulatus SB 1003	WP_013068475	WP_013068476	WP_013068477	WP_013066477	WP_013066480	WP_01306647	WP_01306647	WP_044033652, WP_013067242 NuoB, WP_013067243, WP_013067244 NuoD, WP_013067245, WP_013067247, WP_013067251, WP_013067253 NuoH, WP_013067255, WP_013067257, WP_013067258, WP_013067259, WP_013067260, WP_013067261 NuoN		A, WP_013066132; D, WP_013067457; X, WP_013067458; E, WP_013069227; G, WP_013065957; H, WP_013066967; CoQ9, WP_013069027.	Rhodobacter capsulatus SB 1003				ADE85473.1	ADE86595.1;ADE85941.1
III. High and low affinity																																	facultatively anaerobes
	Magnetovibrio blakemorei			WP_069957717	WP_069957718	WP_069957719							WP_041041044 ba3-like	WP_069956311, WP_069957974 ba3-like	WP_069957980	WP_069957979	WP_084005293	WP_069957977					Magnetovibrio blakemorei						WP_084005291, OEJ67198				Magnetovibrio blakemorei	WP_069958024	WP_069957942	WP_084005281	WP_069956630	WP_069956629	WP_069956632	WP_084004907	WP_069957373, WP_069957372, WP_069957371, WP_069957370, WP_069957369, ..68, ..67,..66,..65,..64,..63, WP_069957456, WP_069957362, WP_069957361	WP_069957788 UbiD, WP_069956939 UbiX, WP_084005221 CoQ7, WP_069958222 MenA, WP_069956382 MenB, WP_069956383 MenC, WP_084004863 MenD, WP_084004861 MenF.	A, WP_069957790; D, WP_069957788; X, WP_069956939;E, WP_084005692; G, WP_069958250; L, WP_069959452; CoQ7, WP_084005221; CoQ9, WP_084005015	Magnetovibrio blakemorei				OEJ69708.1 (~ WP_084004852, 5 a.a. longer)
	Magnetospirillum moscoviense			WP_068498572, WP_068497115 isolated	WP_068498574	WP_082910745							WP_068497093 ba3-like						?	?			Magnetospirillum moscoviense				WP_068497850	WP_068497848	WP_068496305	WP_068497847	WP_068497845		Magnetospirillum moscoviense	WP_068504122	WP_068504119	WP_068504117	WP_068496678	WP_068496679	WP_068496676	WP_068496784	WP_068501612, WP_082910934 NuoB, WP_068501607, WP_068501604 NuoD, WP_068501601, WP_068501598, WP_068501596, WP_068501593 NuoH, WP_068501590, WP_068501586, WP_068501582 NuoK, WP_068501578, WP_068501571, WP_068501630 NuoN	WP_082911003 MenA,	A, WP_068498765; D, WP_068497789; X, WP_068503015; E, WP_068496609; G, WP_068504147; L, WP_068501408; CoQ7, WP_068499576; CoQ9, WP_068499113.	Magnetospirillum moscoviense				OAN49645.1 (WP_082910917 5 a.a. longer)
	Azospirillum brasilense sp7			WP_059398493	WP_035672921	WP_035672924	WP_035678937	WP_035678940	ALJ38154	ALJ38155	ALJ38156	ALJ38157							WP_035676478	WP_035676479	WP_035676480	WP_035676472	Azospirillum brasilense sp7	WP_035682439	WP_035682442	fused	WP_035674797	WP_035674796	WP_014240854	WP_035679569	ALJ36556	OPH13829	Azospirillum brasilense sp7	WP_014198445	WP_035676900	WP_035676897	WP_035675802	WP_014241601	WP_014241603	WP_035675804	WP_035673004, WP_035673009, WP_014240122, WP_051140189, WP_035673012, WP_014240125, WP_035673015, WP_014240127, WP_014240128, WP_035673018, WP_014240130, WP_035673022, WP_014240132, WP_035673025		A, WP_035675219; D, WP_035675227; X, WP_035672587; E, WP_079285102; G, WP_035677973; L, WP_035670670; CoQ7, WP_035682358; CoQ9, WP_051140167.	Azospirillum brasilense sp7					ALJ37521.1;ALJ39036.1
	Inquilinus limosus DSM 16000					WP_026873463, partial	WP_026872492	WP_034852988	WP_026873935	WP_026873936, WP_034846546	WP_026873937	WP_026873938							WP_034835136	WP_052120327	WP_052120329	?	Inquilinus limosus DSM 16000	WP_026872609, WP_026871227	WP_034853744, WP_034846546, WP_026872610, WP_026871226	fused, WP_026871224	WP_034850688	WP_026869298	WP_026869299	WP_051247958	WP_026869300		Inquilinus limosus DSM 16000	WP_026874005	WP_026874004	WP_026874003	WP_026868485	WP_026868486	WP_051247600	WP_026868484	WP_026870399, WP_034851541, WP_034851539, WP_026870396, WP_064742119, WP_026870395, WP_026870394, WP_026870393, WP_026870392, WP_026870391, WP_026870390, WP_026870389, WP_026870388, WP_026870387		A, WP_026868365; E, WP_026870870; G, WP_026873175; L, WP_026872979; CoQ7, WP_026872008; CoQ9, WP_026873526.	Inquilinus limosus DSM 16000
	alpha proteobacterium U9-1i			WP_094747773	WP_094747774	WP_094747775																	alpha proteobacterium U9-1i				WP_094749675	WP_094749673	WP_094749672	WP_094749671	WP_094749670	WP_094746905	alpha proteobacterium U9-1i	WP_094746310	WP_094746309	WP_094746308	WP_094746531	WP_094746525	WP_094746533	WP_094746532	WP_094749051, WP_094749050, WP_0947490489, WP_094749048, WP_094749044 NuoE, WP_094749041, WP_094749038, WP_094749037 NuoH, WP_094749035, WP_094749034, WP_094749033, WP_094749032, WP_094749031 NuoM, WP_094749802 NuoN		A, WP_094749690; E, WP_094747173; G, WP_094748896; L, WP_094747019 & WP_094748282; CoQ7, WP_094748888; CoQ9, WP_094750169 & WP_094748888.	alpha proteobacterium U9-1i				WP_094747332 OAFO
	Candidatus Endolissoclinum sp. TMED37					OUU28410																	Candidatus Endolissoclinum sp. TMED37				OUU13429	OUU13428	OUU13427	OUU13426	OUU13425	OUU26938	Candidatus Endolissoclinum sp. TMED37	OUU18937	OUU18936	OUU18935	OUU15054	OUU15055	OUU15052	OUU15053	OUU20315, OUU20314, OUU20321, OUU20313 NuoD,…, OUU21093 NuoF, OUU21092, OUU21091 NuoH, OUU21090, OUU21089, OUU21094 NuoK, OUU21088, OUU21087, OUU21086 NuoN		A, OUU13433; D, OUU26170; X, OUU25280; E, OUU18967; G, OUU20205; H, OUU27752; CoQ7, OUU22918; CoQ9, OUU25675.	Candidatus Endolissoclinum sp. TMED37				OUU26094
	alpha proteobacterium BAL199						WP_007675864	WP_007675866															alpha proteobacterium BAL199				WP_007668168	WP_007668170	WP_007668175	WP_007668180	WP_007668182	WP_083796887	alpha proteobacterium BAL199	EDP629297	EDP62928	EDP62929	WP_007677214	WP_007677199	EDP62793	WP_007677217	WP_007670149, WP_007670150, WP_007670151, WP_007670152, WP_007670154, WP_007670157, WP_007670159, WP_007670161, WP_040743359, WP_007670165, WP_007670167, WP_007670170, WP_007670172,		A, WP_007673985; E, WP_007679280; G, WP_083796687; L, WP_007677284; CoQ7, WP_007668319; CoQ9, WP_007668319.	alpha proteobacterium BAL199	WP_014241603, WP_007671867, WP_083796690, WP_007671872			WP_007676226
	Rhodobacteraceae bacterium HTCC2150			EBA03098	EBA03099	EBA03100																	Rhodobacteraceae bacterium HTCC2150				WP_008184646	WP_008184022	WP_040785904	WP_008184642	WP_008184640		Rhodobacteraceae bacterium HTCC2150	WP_008187094	WP_008187091	WP_008187089	WP_008183251	WP_008183249	WP_040785339	WP_008183252	WP_008186807, WP_008186808, WP_008186809, WP_008186812 NuoD, WP_008186815, WP_040787022, WP_008186837 NuoG, WP_008186843 NuoH, WP_008186847, WP_008186851, WP_008186853, WP_008186854, WP_083792431 NuoM, WP_008186859 NuoN		A, WP_008187817; E, WP_008182400; G, WP_008182578; L, WP_040785423; CoQ9, WP_008183352.	Rhodobacteraceae bacterium HTCC2150
	Micavibrio aeruginosavorus ARL-13						WP_014101866	WP_014101867															Micavibrio aeruginosavorus ARL-13				WP_014101825	WP_014101824	WP_007668175	WP_007668180	WP_007668182		Micavibrio aeruginosavorus ARL-13	WP_014103211	WP_014103210	WP_014103209	WP_014103455	WP_014103451	WP_014103457	WP_014103456	WP_014102916, WP_014102915, ..14,..13, ..12,..11,..10, WP_014102908, WP_014102906, WP_014102905 NuoI disc.,		A, WP_014101831; E, WP_014102471; G, WP_014102977; L, WP_014103942 & WP_014103193; CoQ9, WP_014101987.	Micavibrio aeruginosavorus ARL-13
IV. Low affinity only																																	strictly aerobes
	Candidatus Neoehrlichia lotoris																						Candidatus Neoehrlichia lotoris str. RAC413				WP_084229839	WP_045809212	WP_045809211	WP_084229831	WP_045809099		Candidatus Neoehrlichia lotoris str. RAC413	WP_045808778	WP_045808777	KJV68957	WP_045809373	WP_094746525	WP_084229863	WP_045809265	WP_045808570, WP_045808672 NuoD, WP_045808673 NuoE, WP_045808756 NuoF, WP_045808670 NuoG, WP_045808671 NuoH, WP_045808739 NuoI, WP_045808754 NuoK,		A, WP_045808842; D, WP_045809128; X, WP_045808654; E, WP_045809215; G, WP_045808704; L, WP_045809120; CoQ7, WP_045809300; CoQ9, WP_045809300.	Candidatus Neoehrlichia lotoris str. RAC413
	alpha proteobacterium RS24																						alpha proteobacterium RS24				ERL46344	ERL46343	ERL46342	ERL46340	ERL46339		alpha proteobacterium RS24	WP_021777089	WP_02177708	WP_038300757	WP_021777432	WP_021777431	WP_021777434.	WP_021777433	WP_021776280,WP_021776281, WP_021776282, WP_021776283, ..84, ..85, WP_038300501, WP_038300403, WP_021776288, WP_021776289, WP_008517421, WP_021776290, WP_021776291, WP_021776292		A, WP_021777326; E, WP_021777693; G, WP_021777902; H, WP_021777587; CoQ7, ERL45971; CoQ9, WP_021776805.	alpha proteobacterium RS24	?
	alpha proteobacterium HIMB5																						alpha proteobacterium HIMB5				WP_014952722	WP_014952723	WP_014952724	WP_014952726	WP_014952727		alpha proteobacterium HIMB5	WP_014952756	WP_014952757	WP_014952758	WP_014952619	WP_014952620	WP_014952617	WP_014952618	WP_014953138, WP_014953139, WP_014953140, WP_014953141, ..42, ..43,..44,..45,..46,..47,..48,..49, WP_014953150, WP_014953151		A, WP_014952714; E, WP_014953879; G, WP_014953721; H, WP_014953962; CoQ7, WP_014953866; CoQ9, WP_014953866.	alpha proteobacterium HIMB5
eukaryotes
	Entamoeba																						Entamoeba										Entamoeba											Entamoeba		EAL51299.1; EAL46751.2 fused	F, EAL45133 & G, ELP86853, not from same genome	EAL51636.2
	Piromyces sp. E2 chytrid fungus																						Piromyces sp. E2 chytrid anarobic fungus										Piromyces sp. E2 chytrid anarobic fungus											Piromyces sp. E2 chytrid anarobic fungus	OUM58069	OUM68179.1; OUM70053.1	E, OUM62451.1; F, OUM59080 - short, might be false positive; & G, OUM58397.1	OUM67866.1 - similar to Chlamydomonas reinhardtii PFO	OUM56280.1, OUM56284.1, OUM58575.1, OUM59248.1, OUM63524.1, OUM67318.1, OUM67857.1, OUM67858.1, OUM67859.1, OUM68614.1, OUM69107.1, OUM69108.1, OUM69478.1
	Acanthamoeba castellanii																						Acanthamoeba castellanii				AAD11820	AAD11820, fused	ELR19456	ELR13456	AAD11825	ELR23175, ELR15235	Acanthamoeba castellanii	ELR24955	AAD11830	ELR16030	ELR22936?	ELR11117	ELR20461		AAD11852 NuoA/ND3, ELR18769 NuoB, AAD11853 NuoC/Nuo9, AAD11854 NuoD/Nad7, ELR25387 NuoE, AAD11824, NuoG/Nad11, AAD11835 NuoH/ND1, AAD11822 ND6, AAD11823 NuoL/ND5, AAD11831 ND4L, AAD11826 ND4, AAD11827 NuoN/ND2		A, ELR19456; E, ELR19629; G, ELR20252; CoQ6, ELR24488; CoQ9, ELR21024.	Acanthamoeba castellanii	ELR22936, ELR24335	JAC89001 from another strain	E, ELR20975.1; F, ELR20974.1 & G, ELR20982.1	ELR14981.1; ELR12930.1; ELR25400.1
	Aspergillus nidulans																						Aspergillus nidulans facultatively anaerobic fungus				COX2_EMEND	COX1_EMEND	EED91714?	CBF69758	COX3_EMEND	AAN39883	Aspergillus nidulans facultatively anaerobic fungus	EAA64417	P00161	EAA65763	EAA63487	EAA64443	EAA60586	EAA65925	YP_006303584, CBF84294 NuoB, CBF86800 Nad7, CAA23994 NuoH/ND1, YP_006303566 NuoK/ND4L, YP_006303567 NuoL/ND5, YP_006303574 NuoM/ND4, YP_006303568 NuoN/ND2		A, EAA63129; D, EAA61416; E, EAA64029; G, EAA63900; CoQ6, PNW87197; CoQ7, CBF77236 & EAA60912; CoQ9, EAA59946.	Aspergillus nidulans facultatively anaerobic fungus	EAA64250	CBF75735.1 (EAA59840, NAR1_EMENI)		CBF87545.1
	Colletotrichum Glomerellales fungus																						Colletotrichum incanum Glomerellales fungus				?	KZL74447	KZL85662	OHW92638		KZL86068	Colletotrichum incanum Glomerellales fungus	OHX00435	? Similar to AKC42429 ?	KZL84037	KZL63364	KZL63371	OHW98278	OHW93252	OHW94474 & OHW98077 NuoB, OHW93062 Nad7, KZL83643 NuoE, KZL64378 NuoF, OHW99829 NuoG, KZL85260 NuoI,		A, KZL80340; D, KZL79659; X, WP_045808654; E, OHW98587; G, KZL63068; CoQ6, KZL81331; CoQ7, OHW94424; CoQ9, OHW99333.	Colletotrichum incanum Glomerellales fungus	OHW93232	KZL79604		WP_069958416, partial
	Chlamydomonas																						Chlamydomonas				EDP00208	CAA47114	EDO96513	EDO98350	AAG17279	EDP06011	Chlamydomonas	EDO96122	P23662	EDO96204	EDP09580	EDP08267	EDP09244	DAA79959	AAQ55461, AAQ63698 NuoB/Nad10, AAQ63700 Nad7, ABX82075 NuoH/ND1, AAO61142 NuoK/ND4L, NP_042566 NuoL/ND5, NP_042565 NuoM/ND4, NP_042568 NuoN/ND2		A, PNW82731; E, PNW86385; G, PNW77138; CoQ6, PNW87197; CoQ7 partial, PNW79122; CoQ9 partial, PNW81999.	Chlamydomonas		XP_001693369.1 (weak), XP_001693376.1 (AAG00591), XP_001694503.1	XP_001691465.1 fused; & G, XP_001691319.1	XP_001701208.1, XP_001693114.1, XP_001699209.1, XP_001699210.1; XP_001701208.1	XP_001689719.1
	Thalassiosira pseudonana																						Thalassiosira pseudonana				AAZ99398	AAZ99394	EED91714	EED89248, partial	AAZ99399	AAZ99399	Thalassiosira pseudonana	EED93624.	YP_316620	EED86511	EED89006	EED93895	EED88949	EED92558	YP_316616, EED89793 NuoB, YP_316618 Nad9, YP_316619 Nad7, YP_316614 NuoK/4ND4L, YP_316594 ND4, YP_316588 ND5, YP_316593 NuoN/ND2		A, EED87173; E, EED91849; G, ACI64424; CoQ6, EED96243.	Thalassiosira pseudonana	EED91076	EED87464		EED96313	EED87193
	Euglena																						Euglena				ALQ28775	AAB03570	?	?	ALQ28775	?	Euglena	?	ALQ28773	P20114					ALQ28777 ND1, AAD38858 ND6, ALQ28779 ND5, ALQ28778 ND4, …	RQ		Euglena	?			CAD28569.1; BAB12024.1; CAC37628.1; CAD28567.1, CAD28569.1
	C. elegans																						C. elegans				NP_006962	NP_006961	CCO25916	CDG24132	NP_006959		C. elegans	CCD61411	NP_006958	CAA99820	CCD62793	CAA87780	CAA82572	CAB04259	NP_006963 NuoA/ND3, NP_006955 ND1, NP_006953 ND6, NP_006964 ND5, NP_006960 ND4, NP_006954 ND4L, NP_006957 ND2	RQ	A, NP_498513; E, NP_498704; G, NP_001041045; CoQ6, NP_505415; CoQ7, NP_498128.	C. elegans	CCD62125?	Nar-I CCD69851.1 (NP_498092)
	Homo sapiens																						Homo sapiens				AGZ05860	AGZ05859	EAW89956	CAG46636	AGZ05863		Homo sapiens	NP_005994	ADT79912	P08574	NP_004159	NP_002991	NP_002992	NP_002993	AGZ05864 NuoA/ND3, AGZ05857 ND1, AGZ05868 ND6, ACZ44392 ND4L, ACZ44394 ND5, AGZ05866 ND4, AGZ05858 ND2	NP_037451 PT_UbiA_UBIAD1		Homo sapiens		Nar-I NP_071938
																																											more information in Degli Esposti (2017)
		bd	bd	cbb3	cbb3	cbb3	Cio	Cio	bo3	bo3	bo3	bo3	ba3	ba3	aa3				(c)aa3				Taxon	b(c)a3	b(c)a3	b(c)a3	aa3	aa3	aa3	aa3	aa3	AOX		bc1	bc1	bc1	II	II	II	II	I	M/RQ	Q			FeFe-HydA	HydEFG	PFO	PFL
																																										fumarate red						pyruvate metabolism
	light gray, known to be present biochemically but gene/accession not available yet	dark gray, missing from genomic data
[truncated: 15 more columns]
